# Supplementary material for: Natural Variation of the RICE FLOWERING LOCUS T 1 Contributes to Flowering Time Divergence in Rice
Source: PubMed Central journal article supplement (PMC3788028; doi:10.1371/journal.pone.0075959), 2013-10-01
Supplement: pone.0075959.s012.pdf [file pone.0075959.s012.pdf]

**Table S1 Genotype of SL520**

| Marker Name | Koshihikari/NonaBokra | SL520 genotype | Position   |                       |                          |                        |
|-------------|-----------------------|----------------|------------|-----------------------|--------------------------|------------------------|
|             |                       |                | Chromosome | Genetic distance (cM) | Physical start position* | Physical end position* |
| RM6887-1    | p                     | K              | 1          | 0.3                   | 207,759                  | 207,986                |
| RM6672      | P                     | K              | 1          | 0.3-4.2               | 281,797                  | 282,026                |
| RM3252      | P                     | K              | 1          | 0.3-4.2               | 301,847                  | 302,072                |
| RM4554      | P                     | K              | 1          | 0.3-4.2               | 388,832                  | 389,075                |
| RM1282      | P                     | K              | 1          | 4.2                   | 548,571                  | 548,804                |
| RM6340      | P                     | K              | 1          | 7                     | 1,058,440                | 1,058,663              |
| RM1331      | p                     | K              | 1          | 8.7                   | 1,669,100                | 1,669,339              |
| RM8068      | p                     | -              | 1          | 8.7                   |                          |                        |
| RM8069      | P                     | K              | 1          | 8.7                   |                          |                        |
| RM6045      | p                     | K              | 1          | 10.9                  | 1,775,753                | 1,775,979              |
| RM7278      | P                     | K              | 1          | 10.9                  | 1,793,825                | 1,794,064              |
| RM5423      | p                     | K              | 1          | 10.9                  | 2,169,122                | 2,169,353              |
| RM6324      | P                     | K              | 1          | 11.7                  | 2,376,751                | 2,376,998              |
| RM3740      | P                     | K              | 1          | 12.5-13.1             | 2,799,991                | 2,800,222              |
| RM7383      | p                     | K              | 1          | 16.4                  | 3,483,382                | 3,483,609              |
| RM3652      | p                     | K              | 1          | 16.4                  | 3,573,153                | 3,573,380              |
| RM6902      | P                     | K              | 1          | 16.4-19.9             | 3,802,382                | 3,802,638              |
| RM5302      | P                     | K              | 1          | 20.2                  | 4,149,094                | 4,149,317              |
| RM3521      | P                     | K              | 1          | 22.6-24.0             | 4,394,421                | 4,394,682              |
| RM6463      | p                     | K              | 1          | 22.6-24.0             | 4,432,422                | 4,432,645              |
| RM8145      | p                     | K              | 1          | 25.4                  |                          |                        |
| RM8146      | P                     | -              | 1          | 25.4                  |                          |                        |
| RM5641      | P                     | K              | 1          | 25.4-26.8             | 4,966,347                | 4,966,587              |
| RM6259      | P                     | K              | 1          | 25.4-26.8             | 4,983,970                | 4,984,196              |
| RM3233      | P                     | K              | 1          | 25.4-26.8             | 5,054,834                | 5,055,060              |
| RM3604      | P                     | K              | 1          | 26.8                  | 5,139,280                | 5,139,505              |
| RM3530      | P                     | K              | 1          | 26.8                  | 5,149,901                | 5,150,178              |
| RM3360      | P                     | K              | 1          | 27.3                  | 5,236,387                | 5,236,616              |
| RM1118      | P                     | K              | 1          | 28.4-28.9             | 5,566,482                | 5,566,705              |
| RM3746      | P                     | K              | 1          | 30.5                  | 6,154,949                | 6,155,182              |
| RM1360      | P                     | K              | 1          | 30.5                  | 6,219,830                | 6,220,081              |
| RM5443      | P                     | K              | 1          | 30.5                  | 6,224,491                | 6,224,724              |
| RM8111      | P                     | K              | 1          | 30.8                  |                          |                        |
| RM6539      | P                     | K              | 1          | 32.4-36.9             | 6,996,283                | 6,996,506              |
| RM6786      | P                     | K              | 1          | 32.4-36.9             | 7,075,295                | 7,075,518              |
| RM1220      | P                     | K              | 1          | 36.9                  | 7,242,799                | 7,243,028              |
| RM8098      | P                     | K              | 1          | 36.9                  |                          |                        |
| RM8077      | P                     | K              | 1          | 37.4                  |                          |                        |
| RM8078      | P                     | K              | 1          | 37.4                  |                          |                        |
| RM3598      | P                     | K              | 1          | 38.8                  | 7,347,806                | 7,348,031              |
| RM5800      | P                     | K              | 1          | 38.8                  | 7,396,757                | 7,396,980              |
| RM3235      | P                     | K              | 1          | 38.8                  | 7,516,125                | 7,516,350              |
| RM3234      | P                     | K              | 1          | 38.8                  | 7,570,356                | 7,570,581              |
| RM8143      | p                     | K              | 1          | 38.8                  |                          |                        |
| RM3780      | p                     | K              | 1          | 42.4-43.2             | 8,017,941                | 8,018,176              |
| RM5496      | P                     | K              | 1          | 42.4-43.2             | 8,074,158                | 8,074,405              |
| RM8141      | P                     | K              | 1          | 43.2                  |                          |                        |
| RM5346      | p                     | K              | 1          | 45.4                  | 8,750,010                | 8,750,235              |
| RM8093      | P                     | K              | 1          | 45.4-46.3             |                          |                        |
| RM8083      | P                     | K              | 1          | 46.3                  |                          |                        |
| RM3384      | p                     | K              | 1          | 49                    | 9,180,830                | 9,181,061              |
| RM6466      | p                     | K              | 1          | 49                    | 9,191,124                | 9,191,347              |
| RM6613      | p                     | K              | 1          | 49.3                  | 9,263,899                | 9,264,125              |
| RM1032      | p                     | K              | 1          | 49.3                  | 9,317,405                | 9,317,632              |
| RM8131      | P                     | K              | 1          | 49.6                  |                          |                        |
| RM8132      | P                     | K              | 1          | 49.6                  |                          |                        |
| RM8133      | P                     | K              | 1          | 49.6                  |                          |                        |
| RM6642      | P                     | K              | 1          | 49.6-50.8             | 9,594,148                | 9,594,371              |
| RM8070      | P                     | K              | 1          | 49.6-50.8             |                          |                        |
| RM8071      | P                     | K              | 1          | 49.6-50.8             |                          |                        |
| RM6039      | p                     | K              | 1          | 50.8                  | 9,710,984                | 9,711,210              |
| RM6190      | p                     | K              | 1          | 50.8                  | 9,732,986                | 9,733,209              |
| RM8051      | P                     | K              | 1          | 52.1                  |                          |                        |
| RM8052      | P                     | K              | 1          | 52.1                  |                          |                        |
| RM8053-1    | P                     | K              | 1          | 52.1                  |                          |                        |
| RM8045      | P                     | K              | 1          | 52.4                  |                          |                        |
| RM8046      | P                     | K              | 1          | 52.4                  |                          |                        |
| RM3627      | P                     | K              | 1          | 54.3                  | 10,306,915               | 10,307,140             |
| RM1287-1    | p                     | K              | 1          | 58.1                  | 10,837,475               | 10,837,708             |
| RM8094      | P                     | K              | 1          | 60.6                  |                          |                        |
| RM8095      | P                     | K              | 1          | 60.6                  |                          |                        |
| RM3412      | P                     | K              | 1          | 62.5                  | 11,566,862               | 11,567,095             |
| RM5365      | P                     | K              | 1          | 72.8                  | 14,500,839               | 14,501,064             |
| RM7075      | P                     | K              | 1          | 73.1                  | 15,101,695               | 15,101,946             |
| RM6681      | P                     | K              | 1          | 73.4                  | 15,880,764               | 15,881,020             |
| RM6711      | P                     | K              | 1          | 73.4                  | 16,094,680               | 16,094,903             |
| RM5964      | P                     | K              | 1          | 73.4                  | 17,577,387               | 17,577,616             |
| RM5422      | P                     | K              | 1          | 73.7-78.0             | 18,752,836               | 18,753,067             |
| RM6092      | P                     | K              | 1          | 78                    | 19,118,132               | 19,118,364             |
| RM8139      | P                     | K              | 1          | 78                    |                          |                        |
| RM8004      | P                     | K              | 1          | 78.1                  |                          |                        |
| RM5638      | P                     | K              | 1          | 86                    | 20,931,939               | 20,932,177             |
| RM6892      | P                     | K              | 1          | 87.1                  | 21,254,213               | 21,254,442             |
| RM3341      | P                     | K              | 1          | 87.4-90.0             | 21,883,862               | 21,884,091             |
| RM7405      | P                     | K              | 1          | 87.4-90.0             | 21,899,161               | 21,899,392             |
| RM1196      | P                     | K              | 1          | 87.4-90.0             | 21,900,409               | 21,900,636             |
| RM6880      | p                     | K              | 1          | 90                    | 21,991,693               | 21,991,922             |
| RM5718      | P                     | K              | 1          | 94.5                  | 22,923,359               | 22,923,648             |
| RM5646      | P                     | K              | 1          | 94.5-95.7             | 22,954,795               | 22,955,039             |
| RM6716      | P                     | K              | 1          | 95.7                  | 23,116,909               | 23,117,135             |
| RM8144      | P                     | K              | 1          | 95.7                  |                          |                        |
| RM6033      | p                     | K              | 1          | 100.4-101.8           | 24,360,737               | 24,360,963             |
| RM3682      | P                     | K              | 1          | 100.4-101.8           | 24,371,946               | 24,372,175             |
| RM7124      | P                     | K              | 1          | 100.4-101.8           | 24,386,887               | 24,387,122             |
| RM7266      | P                     | K              | 1          | 100.4-101.8           | 24,446,211               | 24,446,442             |
| RM5919      | p                     | K              | 1          | 101.8-102.3           | 24,732,575               | 24,732,849             |
| RM3642      | P                     | K              | 1          | 102.3                 | 24,862,256               | 24,862,483             |

|          |   |   |   |             |            |            |
|----------|---|---|---|-------------|------------|------------|
| RM1349-1 | P | K | 1 | 103.7       | 25,067,321 | 25,067,566 |
| RM8129   | P | K | 1 | 103.7       |            |            |
| RM7318   | P | K | 1 | 110.2       | 26,136,714 | 26,136,937 |
| RM3143   | P | K | 1 | 112.7       | 26,814,812 | 26,815,045 |
| RM8128   | P | K | 1 | 112.7       |            |            |
| RM5461   | p | K | 1 | 113         | 26,900,351 | 26,900,588 |
| RM3440   | P | K | 1 | 114.1       | 27,184,961 | 27,185,198 |
| RM6738   | P | K | 1 | 114.1-116.5 | 27,504,650 | 27,504,915 |
| RM5497   | P | K | 1 | 114.1-116.5 | 27,538,182 | 27,538,431 |
| RM1232   | p | K | 1 | 116.5       | 27,626,812 | 27,627,041 |
| RM7419   | P | K | 1 | 116.5       | 27,695,503 | 27,695,726 |
| RM1297-1 | P | K | 1 | 121.6       | 28,606,463 | 28,606,698 |
| RM3336   | P | K | 1 | 121.6       | 28,608,488 | 28,608,717 |
| RM1244   | P | K | 1 | 122.1       | 28,684,383 | 28,684,612 |
| RM3817   | P | K | 1 | 122.1       | 28,897,188 | 28,897,427 |
| RM5931   | P | K | 1 | 122.6       | 29,277,928 | 29,278,241 |
| RM1117   | p | K | 1 | 122.6       | 29,288,007 | 29,288,230 |
| RM5486   | P | K | 1 | 122.6       | 29,362,170 | 29,362,413 |
| RM8126   | P | K | 1 | 122.6       |            |            |
| RM1231   | p | K | 1 | 123.1       | 29,472,275 | 29,472,504 |
| RM3547   | p | K | 1 | 123.1       | 29,472,359 | 29,472,582 |
| RM6405   | p | K | 1 | 123.1       | 29,529,969 | 29,530,192 |
| RM6702   | P | K | 1 | 123.2-123.5 | 29,763,406 | 29,763,641 |
| RM3615   | P | K | 1 | 123.5       | 29,799,939 | 29,800,164 |
| RM7371   | P | K | 1 | 123.5       | 29,800,877 | 29,801,100 |
| RM3614   | P | K | 1 | 123.5       | 29,823,686 | 29,823,911 |
| RM1061   | p | K | 1 | 124.8       | 30,171,860 | 30,172,095 |
| RM1183   | P | K | 1 | 127.3       | 30,973,420 | 30,973,647 |
| RM3411   | P | K | 1 | 129         | 31,305,594 | 31,305,827 |
| RM1268   | P | K | 1 | 129         | 31,404,076 | 31,404,307 |
| RM8096   | P | K | 1 | 129         |            |            |
| RM8097   | P | K | 1 | 129         |            |            |
| RM5914   | P | K | 1 | 129.3       | 1,631,848  | 1,632,116  |
| RM6581   | P | K | 1 | 129.3       | 31,495,606 | 31,495,841 |
| RM3324   | p | K | 1 | 130.1       | 31,713,093 | 31,713,320 |
| RM3632   | p | K | 1 | 130.1-132.0 | 31,908,318 | 31,908,543 |
| RM3709   | P | K | 1 | 130.1-132.0 | 31,941,688 | 31,941,917 |
| RM1216   | p | K | 1 | 132         | 32,101,564 | 32,101,791 |
| RM6648   | p | K | 1 | 132.8       | 32,331,565 | 32,331,788 |
| RM3416   | p | K | 1 | 134.7-135.8 | 32,886,553 | 32,886,786 |
| RM3285   | p | K | 1 | 135.8       | 33,043,964 | 33,044,189 |
| RM8002   | P | K | 1 | 136.1       |            |            |
| RM8124   | P | K | 1 | 136.2       |            |            |
| RM1003   | P | K | 1 | 136.6       | 33,470,185 | 33,470,408 |
| RM7180   | P | K | 1 | 136.9       | 34,098,712 | 34,098,935 |
| RM8061   | P | K | 1 | 136.9       |            |            |
| RM6703   | P | K | 1 | 139.1       | 34,508,380 | 34,508,615 |
| RM5811   | P | K | 1 | 139.1       | 34,629,679 | 34,629,908 |
| RM6608   | p | K | 1 | 139.4       | 34,683,228 | 34,683,451 |
| RM8084   | P | K | 1 | 140.2       |            |            |
| RM3304   | P | K | 1 | 140.2-140.5 | 34,949,799 | 34,950,026 |
| RM3403   | P | K | 1 | 140.5       | 34,989,901 | 34,990,134 |
| RM7594   | P | K | 1 | 140.5-141.6 | 35,465,411 | 35,465,628 |
| RM5389   | P | K | 1 | 142.4       | 35,726,592 | 35,726,819 |
| RM3640   | P | K | 1 | 142.4       | 35,831,691 | 35,831,918 |
| RM7250   | P | K | 1 | 143.2       | 36,079,534 | 36,079,757 |
| RM3738   | P | K | 1 | 143.7-144.5 | 36,927,811 | 36,928,042 |
| RM6618   | p | K | 1 | 144.5       | 37,006,411 | 37,006,637 |
| RM5448   | P | K | 1 | 146.4       | 37,391,539 | 37,391,774 |
| RM1198   | p | K | 1 | 146.4       | 37,596,962 | 37,597,189 |
| RM6333   | P | K | 1 | 147.2       | 38,002,891 | 38,003,114 |
| RM1339-1 | P | K | 1 | 147.5       | 38,191,138 | 38,191,381 |
| RM3442-1 | P | K | 1 | 147.5       | 38,196,724 | 38,196,961 |
| RM6696   | P | K | 1 | 147.5       | 38,214,944 | 38,215,242 |
| RM1068   | P | K | 1 | 150.7       | 38,432,397 | 38,432,636 |
| RM6504   | P | K | 1 | 154.6       | 38,979,878 | 38,980,101 |
| RM3602   | P | K | 1 | 155.2       | 39,001,828 | 39,002,053 |
| RM5759   | p | K | 1 | 155.2       | 39,013,725 | 39,013,948 |
| RM7246   | P | K | 1 | 157.1       | 39,164,091 | 39,164,318 |
| RM6827   | P | K | 1 | 157.1       | 39,197,070 | 39,197,302 |
| RM8062   | P | K | 1 | 157.1       |            |            |
| RM8066   | P | K | 1 | 157.1       |            |            |
| RM8067   | P | K | 1 | 157.1       |            |            |
| RM3810   | P | K | 1 | 157.6       | 39,485,367 | 39,485,606 |
| RM3523   | P | - | 1 | 157.6       | 39,817,281 | 39,817,544 |
| RM3468-1 | P | K | 1 | 159.6       | 40,136,256 | 40,136,497 |
| RM1387   | P | K | 1 | 159         | 40,200,960 | 40,201,247 |
| RM3520-1 | P | K | 1 | 159.6       | 40,246,914 | 40,247,175 |
| RM5362   | P | K | 1 | 163.8       | 41,080,377 | 41,080,602 |
| RM5410   | p | K | 1 | 163.8       | 41,088,099 | 41,088,328 |
| RM8099   | P | K | 1 | 163.8       |            |            |
| RM5310   | P | K | 1 | 164.1       | 41,190,655 | 41,190,890 |
| RM8089   | P | K | 1 | 167.2-169.5 |            |            |
| RM6321   | P | K | 1 | 181.1       | 42,916,492 | 42,916,733 |
| RM1067   | P | K | 1 | 181.1       | 42,916,739 | 42,916,978 |
| RM3362   | P | K | 1 | 181.8       | 43,036,305 | 43,036,533 |
| RM6840   | P | K | 1 | 181.8       | 43,165,074 | 43,165,324 |
| RM8135   | P | K | 1 | 181.8       |            |            |
| RM8136   | P | K | 1 | 181.8       |            |            |
| RM8137   | P | K | 1 | 181.8       |            |            |
| RM6143   | p | K | 2 | 0           | 73,456     | 73,682     |
| RM6842   | P | K | 2 | 0           | 124,579    | 124,841    |
| RM7451   | P | K | 2 | 2.5-4.7     | 651,794    | 652,025    |
| RM6938   | P | K | 2 | 4.7-6.9     | 977,699    | 978,012    |
| RM6367   | P | K | 2 | 4.7-6.9     | 1,132,184  | 1,132,425  |
| RM7562   | p | K | 2 | 8.9         | 1,878,293  | 1,878,520  |
| RM3096   | P | K | 2 | 13.4        | 2,835,481  | 2,835,613  |
| RM6616   | P | K | 2 | 13.4        | 2,864,997  | 2,865,224  |
| RM3188   | P | K | 2 | 15          | 3,453,704  | 3,453,927  |
| RM1075   | p | K | 2 | 17.9        | 3,833,199  | 3,833,442  |
| RM1285   | p | K | 2 | 17.9        | 3,837,883  | 3,838,116  |
| RM3703   | p | K | 2 | 17.9        | 3,863,713  | 3,863,942  |
| RM7581   | P | K | 2 | 19.0-20.9   | 4,206,244  | 4,206,483  |

|          |   |   |   |             |            |            |
|----------|---|---|---|-------------|------------|------------|
| RM5996   | p | K | 2 | 19.0-20.9   | 4,208,497  | 4,208,720  |
| RM5512   | P | K | 2 | 19.0-20.9   | 4,221,150  | 4,221,373  |
| RM4355   | P | K | 2 | 19.0-20.9   | 4,264,218  | 4,264,455  |
| RM5622   | P | K | 2 | 19.0-20.9   | 4,273,659  | 4,273,891  |
| RM3732   | P | K | 2 | 20.9        | 4,407,819  | 4,408,050  |
| RM6641   | P | K | 2 | 23.3        | 4,633,939  | 4,634,180  |
| RM3497   | P | K | 2 | 23.3        | 4,699,248  | 4,699,497  |
| RM6654   | P | K | 2 | 23.3-25.5   | 4,816,938  | 4,817,161  |
| RM4949   | P | K | 2 | 23.3-25.5   | 4,835,690  | 4,835,953  |
| RM5350   | p | K | 2 | 23.3-25.5   | 4,911,308  | 4,911,533  |
| RM2008   | P | K | 2 | 23-25       | 4,934,093  | 4,934,330  |
| RM7082   | P | K | 2 | 25.5        | 5,100,890  | 5,101,113  |
| RM3294   | P | K | 2 | 25.5        | 5,204,927  | 5,205,154  |
| RM1347   | P | K | 2 | 26.9        | 5,314,354  | 5,314,603  |
| RM5664   | p | K | 2 | 26.9        | 5,379,400  | 5,379,626  |
| RM5780   | P | K | 2 | 26.9        | 5,453,123  | 5,453,364  |
| RM6378   | P | K | 2 | 28          | 5,477,465  | 5,477,721  |
| RM4702   | P | K | 2 | 31.2        | 6,218,964  | 6,219,213  |
| RM5897   | p | K | 2 | 32.8        | 6,732,589  | 6,732,833  |
| RM2939   | p | K | 2 | 33.6-36.3   | 7,420,111  | 7,420,388  |
| RM2468   | P | K | 2 | 36.3        | 7,420,437  | 7,420,680  |
| RM5340   | P | K | 2 | 36.3        | 7,482,266  | 7,482,489  |
| RM2814   | P | K | 2 | 36.3        | 7,486,314  | 7,486,591  |
| RM5459   | p | K | 2 | 36.3        | 7,518,136  | 7,518,371  |
| RM3828   | P | K | 2 | 36.3-36.8   | 7,645,604  | 7,645,845  |
| RM7636   | P | K | 2 | 36.3-36.8   | 7,663,243  | 7,663,486  |
| RM3390   | p | K | 2 | 36.3-36.8   | 7,663,463  | 7,663,694  |
| RM6853   | P | K | 2 | 42.1        | 8,955,928  | 8,956,151  |
| RM5699   | P | K | 2 | 42.1        | 8,980,479  | 8,980,738  |
| RM6911   | p | K | 2 | 42.1        | 9,008,053  | 9,008,321  |
| RM7288   | P | K | 2 | 42.1        | 9,032,605  | 9,032,884  |
| RM6639   | P | K | 2 | 42.4-43.4   | 9,415,458  | 9,415,681  |
| RM6375   | p | K | 2 | 43.4-47.8   | 9,554,650  | 9,554,903  |
| RM1358   | P | K | 2 | 48.1        | 10,184,619 | 10,184,866 |
| RM3501   | P | K | 2 | 48.1        | 10,186,608 | 10,186,857 |
| RM2792   | P | K | 2 | 50.3        | 10,754,117 | 10,754,386 |
| RM1106   | p | K | 2 | 50.3        | 10,996,526 | 10,996,749 |
| RM5015   | P | K | 2 | 50.3        | 25,214,230 | 25,214,395 |
| RM5862   | P | K | 2 | 58.4        | 6,005,859  | 6,006,184  |
| RM5791   | p | K | 2 | 50.3        | 10,746,744 | 10,746,967 |
| RM5390   | p | N | 2 | 50.3        | 10,806,207 | 10,806,434 |
| RM1081   | P | K | 2 | 50.8        | 11,182,475 | 11,182,728 |
| RM1313   | P | K | 2 | 51.1        | 11,261,996 | 11,262,233 |
| RM5619   | P | K | 2 | 52.2        | 12,009,734 | 12,009,963 |
| RM5439   | p | K | 2 | 52.2-53.5   | 12,098,978 | 12,099,211 |
| RM5210   | p | K | 2 | 54.6        | 12,665,916 | 12,666,201 |
| RM3443   | P | K | 2 | 54.6        | 14,430,889 | 14,431,126 |
| RM6374   | p | K | 2 | 54.6        | 15,287,698 | 15,287,945 |
| RM5521   | p | K | 2 | 54.9-55.4   | 15,951,309 | 15,951,532 |
| RM5812   | P | K | 2 | 55.4        | 15,999,785 | 16,000,017 |
| RM7426   | p | K | 2 | 57.3        | 16,778,169 | 16,778,392 |
| RM5101   | P | K | 2 | 58.4-59.5   | 18,161,640 | 18,161,910 |
| RM6844   | p | K | 2 | 58.4-59.5   | 18,169,315 | 18,169,604 |
| RM1211-1 | P | K | 2 | 59.5-62.2   | 18,556,018 | 18,556,245 |
| RM7413   | P | K | 2 | 59.5-62.2   | 18,558,423 | 18,558,646 |
| RM4499   | P | K | 2 | 62.2        | 18,635,391 | 18,635,642 |
| RM5578-1 | P | K | 2 | 62.2-64.7   | 18,738,310 | 18,738,483 |
| RM3858   | P | K | 2 | 62.2-71.3   | 19,208,110 | 19,208,361 |
| RM6509   | P | K | 2 | 71.3        | 19,361,543 | 19,361,766 |
| RM6380   | P | K | 2 | 71.3-77.8   | 19,768,222 | 19,768,502 |
| RM1379   | P | K | 2 | 77.8-79.6   | 20,076,041 | 20,076,304 |
| RM2634   | P | K | 2 | 80.5-81.4   | 20,520,494 | 20,520,759 |
| RM3666   | p | K | 2 | 81.7        | 20,922,006 | 20,922,233 |
| RM6023   | p | K | 2 | 81.7        | 20,996,865 | 20,997,088 |
| RM5614   | P | K | 2 | 81.7-83.6   | 21,080,751 | 21,080,977 |
| RM5427   | P | K | 2 | 85.9        | 21,544,286 | 21,544,517 |
| RM5789   | P | K | 2 | 88.2        | 22,409,717 | 22,409,940 |
| RM3688   | P | K | 2 | 88.2        | 22,420,121 | 22,420,350 |
| RM3762-1 | P | K | 2 | 88.2-89.9   | 22,481,790 | 22,482,025 |
| RM3352   | P | K | 2 | 93.2        | 23,592,372 | 23,592,601 |
| RM3515-1 | P | K | 2 | 95.5        | 24,041,789 | 24,042,044 |
| RM1942   | p | K | 2 | 102.6       | 25,337,550 | 25,337,687 |
| RM1920   | P | K | 2 | 103.4       | 25,485,748 | 25,485,983 |
| RM1307   | p | K | 2 | 103.9-105.8 | 25,849,777 | 25,850,012 |
| RM3730   | p | K | 2 | 106.6       | 26,260,832 | 26,261,057 |
| RM5706   | P | K | 2 | 109.3       | 26,503,898 | 26,504,160 |
| RM4472   | P | K | 2 | 109.3       | 26,572,908 | 26,573,148 |
| RM7511   | p | K | 2 | 109.3       | 26,626,615 | 26,626,870 |
| RM1385   | p | K | 2 | 109.3       | 26,664,906 | 26,665,183 |
| RM1367-1 | P | K | 2 | 110.6       | 27,083,759 | 27,084,012 |
| RM3508   | P | K | 2 | 110.9       | 27,101,283 | 27,101,534 |
| RM5470-1 | P | K | 2 | 111.2-112.6 | 27,172,400 | 27,172,639 |
| RM3512-1 | P | K | 2 | 112.6       | 27,339,280 | 27,339,535 |
| RM3763   | P | K | 2 | 114.0-118.1 | 27,950,071 | 27,950,306 |
| RM3289   | P | K | 2 | 114.0-118.1 | 27,967,247 | 27,967,474 |
| RM1342-1 | P | K | 2 | 114.0-118.1 | 28,183,765 | 28,184,008 |
| RM5631   | P | K | 2 | 118.1       | 28,291,905 | 28,292,140 |
| RM6465   | P | K | 2 | 118.1       | 28,381,313 | 28,381,536 |
| RM3685   | P | K | 2 | 123.9       | 29,313,202 | 29,313,431 |
| RM6933-1 | P | K | 2 | 123.9       | 29,331,877 | 29,332,178 |
| RM6424   | P | K | 2 | 125.6       | 29,644,314 | 29,644,540 |
| RM5303   | p | K | 2 | 126.4       | 29,857,607 | 29,857,830 |
| RM5378   | p | K | 2 | 126.4       | 29,886,347 | 29,886,574 |
| RM6290   | p | K | 2 | 126.4       | 29,895,626 | 29,895,855 |
| RM3275   | p | K | 2 | 128.3       | 30,128,666 | 30,128,891 |
| RM5472   | P | K | 2 | 130.2       | 30,661,496 | 30,661,735 |
| RM8024   | p | K | 2 | 130.2-131.8 |            |            |
| RM6627   | p | K | 2 | 138.0-140.9 | 32,765,727 | 32,765,950 |
| RM5958   | p | K | 2 | 138.0-140.9 | 32,859,599 | 32,859,822 |
| RM8029   | P | K | 2 | 138-140.9   |            |            |
| RM8030   | P | K | 2 | 138-140.9   |            |            |
| RM3212   | p | K | 2 | 150.5       | 28,885,630 | 28,885,853 |
| RM5833   | p | K | 2 | 150.5       | 28,891,024 | 28,891,271 |

|          |   |   |   |             |            |            |
|----------|---|---|---|-------------|------------|------------|
| RM7009   | p | K | 2 | 141.7       | 32,984,925 | 32,985,148 |
| RM7286   | P | K | 2 | 141.7       | 33,018,942 | 33,019,205 |
| RM6733   | p | K | 2 | 141.7       | 33,019,361 | 33,019,620 |
| RM6636   | p | K | 2 | 141.7-142.5 | 33,097,317 | 33,097,546 |
| RM5460   | p | K | 2 | 144.7-146.6 | 33,791,476 | 33,791,713 |
| RM1092   | P | K | 2 | 144.7-146.6 | 33,872,124 | 33,872,347 |
| RM5300   | P | K | 2 | 144.7-146.6 | 33,882,838 | 33,883,061 |
| RM5421   | p | K | 2 | 151.6       | 34,707,935 | 34,708,166 |
| RM3789-1 | p | K | 2 | 150.5       | 34,709,081 | 34,709,320 |
| RM3535   | P | - | 2 | 150.5       | 34,713,756 | 34,713,979 |
| RM3542   | P | K | 2 | 154.1       | 35,162,893 | 35,163,116 |
| RM1255   | p | K | 2 | 155.5       | 35,280,259 | 35,280,490 |
| RM6312   | p | K | 2 | 156.3       | 35,409,179 | 35,409,411 |
| RM2265   | p | K | 2 | 156.3       | 35,424,268 | 35,424,515 |
| RM3850   | p | K | 2 | 157.9       | 35,450,087 | 35,450,334 |
| RM7388   | p | K | 2 | 157.9       | 35,496,843 | 35,497,066 |
| RM4470   | p | K | 2 | 157.9       | 35,562,394 | 35,562,533 |
| RM5643   | p | K | 2 | 157.9       | 35,578,313 | 35,578,557 |
| RM7337   | P | K | 2 | 157.9       | 35,627,914 | 35,628,141 |
| RM3274   | P | K | 2 | 157.9-      | 35,729,115 | 35,729,340 |
| RM6139   | p | K | 2 | 157.9       | 35,863,439 | 35,863,665 |
| RM5807   | p | K | 2 | 157.9       | 35,873,088 | 35,873,314 |
| RM3265   | p | K | 3 | 0.0-1.1     | 82,175     | 82,400     |
| RM3413   | P | K | 3 | 0.0-1.1     | 347,739    | 347,972    |
| RM3387   | p | K | 3 | 0.0-1.1     | 359,398    | 359,621    |
| RM7332   | P | K | 3 | 0.0-1.1     | 390,495    | 390,742    |
| RM4108   | P | K | 3 | 1.1         | 514,807    | 515,034    |
| RM3203   | P | K | 3 | 2.2         | 776,074    | 776,297    |
| RM3202   | p | K | 3 | 2.2         | 789,282    | 789,505    |
| RM3894   | P | K | 3 | 2.5         | 1,097,600  | 1,097,829  |
| RM4853   | P | K | 3 | 6           | 1,376,815  | 1,377,070  |
| RM3372   | P | K | 3 | 6           | 1,437,106  | 1,437,337  |
| RM7072   | P | K | 3 | 13.3        | 2,552,210  | 2,552,457  |
| RM6829   | P | K | 3 | 14.4        | 2,862,108  | 2,862,340  |
| RM4683   | P | K | 3 | 14.8        | 3,162,565  | 3,162,822  |
| RM6849   | P | K | 3 | 15.2        | 3,268,540  | 3,268,763  |
| RM3126   | P | K | 3 | 16.8        | 3,661,177  | 3,661,404  |
| RM5474   | P | K | 3 | 16.8-17.9   | 3,785,867  | 3,786,108  |
| RM3392   | P | K | 3 | 17.9        | 3,808,695  | 3,808,928  |
| RM5819   | P | K | 3 | 18.4-20.3   | 4,268,176  | 4,268,411  |
| RM4352   | P | K | 3 | 18.4-20.3   | 4,296,887  | 4,297,120  |
| RM3195   | P | K | 3 | 21.5        | 4,464,394  | 4,464,617  |
| RM4992   | P | K | 3 | 22.1        | 4,706,012  | 4,706,275  |
| RM6038   | p | K | 3 | 24.4        | 4,811,135  | 4,811,361  |
| RM5480   | P | K | 3 | 99          | 5,306,022  | 5,306,263  |
| RM5442   | P | K | 3 | 25.9-27.9   | 5,496,736  | 5,496,969  |
| RM5444   | P | K | 3 | 25.9-27.9   | 5,559,867  | 5,560,100  |
| RM3417   | p | K | 3 | 27.9        | 5,617,483  | 5,617,716  |
| RM3864   | P | K | 3 | 28.1        | 5,828,327  | 5,828,584  |
| RM5570   | P | K | 3 | 28.1        | 5,840,126  | 5,840,361  |
| RM5755   | P | K | 3 | 28.2        | 5,927,260  | 5,927,537  |
| RM3467   | P | K | 3 | 28.5        | 5,971,918  | 5,972,159  |
| RM1324   | P | K | 3 | 28.5        | 6,004,608  | 6,004,847  |
| RM7576   | P | K | 3 | 28.5        | 6,046,694  | 6,046,925  |
| RM5347   | p | K | 3 | 30.5        | 6,396,098  | 6,396,323  |
| RM5477   | p | K | 3 | 31.1        | 6,521,156  | 6,521,397  |
| RM3441   | P | K | 3 | 31.1        | 6,550,779  | 6,551,016  |
| RM3029   | P | K | 3 | 31.3        | 6,676,577  | 6,676,862  |
| RM5925-1 | P | K | 3 | 31.3-33.5   | 6,769,689  | 6,769,975  |
| RM6291   | P | K | 3 | 31.3-33.5   | 6,779,869  | 6,780,098  |
| RM3716   | p | K | 3 | 33.5        | 6,807,809  | 6,807,986  |
| RM3872   | P | K | 3 | 33.5        | 6,820,447  | 6,820,718  |
| RM3766-1 | P | K | 3 | 34.8        | 6,902,036  | 6,902,271  |
| RM1002   | p | K | 3 | 36.1        | 7,110,431  | 7,110,654  |
| RM6308   | p | K | 3 | 36.1        | 7,148,579  | 7,148,805  |
| RM1022   | p | K | 3 | 36.9        | 7,201,275  | 7,201,500  |
| RM3134   | p | K | 3 | 36.9        | 7,208,899  | 7,209,126  |
| RM3545   | p | K | 3 | 36.9        | 7,292,627  | 7,292,850  |
| RM6417   | p | K | 3 | 39.0-40.3   | 8,076,902  | 8,077,125  |
| RM1338-1 | P | K | 3 | 40.3        | 8,362,219  | 8,362,460  |
| RM4996   | P | K | 3 | 40.3        | 8,452,116  | 8,452,383  |
| RM5896   | P | K | 3 | 40.3        | 8,515,258  | 8,515,499  |
| RM5686-1 | P | K | 3 | 40.3        | 8,515,300  | 8,515,550  |
| RM6783   | P | K | 3 | 43.5        | 9,285,953  | 9,286,182  |
| RM1256   | p | K | 3 | 44.1-44.4   | 9,714,194  | 9,714,425  |
| RM1371   | P | K | 3 | 44.4-46.6   | 9,912,283  | 9,912,538  |
| RM2790   | P | K | 3 | 49.3-50.8   | 4,505,358  | 4,505,491  |
| RM4321   | P | K | 3 | 46.6        | 10,140,187 | 10,140,320 |
| RM3434   | P | K | 3 | 48.5        | 10,745,699 | 10,745,934 |
| RM3280   | P | K | 3 | 48.8        | 10,874,641 | 10,874,866 |
| RM7365   | p | K | 3 | 49.3        | 11,249,158 | 11,249,401 |
| RM4512   | P | K | 3 | 50.3        | 11,279,913 | 11,280,055 |
| RM3562   | p | K | 3 | 50.8-54.7   | 11,654,458 | 11,654,681 |
| RM5748   | p | K | 3 | 54.7-55.8   | 12,297,668 | 12,297,903 |
| RM5928-1 | P | K | 3 | 56.3        | 12,547,308 | 12,547,609 |
| RM5551   | P | K | 3 | 59.5        | 12,901,279 | 12,901,508 |
| RM7323   | P | K | 3 | 59.5-61.9   | 12,943,737 | 12,943,964 |
| RM5419   | P | K | 3 | 59.5-61.9   | 12,997,973 | 12,998,204 |
| RM1319   | p | K | 3 | 59.5-61.9   | 12,998,170 | 12,998,409 |
| RM5903   | P | K | 3 | 61.9        | 13,253,598 | 13,253,851 |
| RM5489   | P | K | 3 | 61.9        | 13,278,065 | 13,278,311 |
| RM3291   | P | K | 3 | 61.9-63.3   | 13,574,445 | 13,574,672 |
| RM6080   | p | K | 3 | 63.3        | 13,768,001 | 13,768,227 |
| RM6676-1 | P | K | 3 | 65.4        | 14,327,586 | 14,327,821 |
| RM6959   | P | K | 3 | 65.4        | 14,340,966 | 14,341,192 |
| RM7369   | p | K | 3 | 65.4-68.7   | 14,531,873 | 14,532,096 |
| RM3204   | P | K | 3 | 69.2        | 14,825,418 | 14,825,641 |
| RM3400   | p | K | 3 | 84.4        | 17,071,966 | 17,072,199 |
| RM6914   | P | K | 3 | 84.4        | 17,098,188 | 17,098,459 |
| RM1334   | P | K | 3 | 84.4-85.2   | 17,228,387 | 17,228,628 |
| RM2346   | P | K | 3 | 85.2        | 17,501,166 | 17,501,415 |
| RM1940   | P | K | 3 | 86          | 17,968,464 | 17,968,705 |
| RM7642   | p | K | 3 | 86          | 18,437,963 | 18,438,190 |

|          |   |   |   |             |            |            |
|----------|---|---|---|-------------|------------|------------|
| RM2453   | P | K | 3 | 86          | 20,046,012 | 20,046,165 |
| RM7370   | p | K | 3 | 86.5        | 20,951,356 | 20,951,579 |
| RM5488   | P | K | 3 | 87.1        | 21,193,732 | 21,193,977 |
| RM3646   | P | K | 3 | 87.9        | 21,798,652 | 21,798,879 |
| RM7134   | P | K | 3 | 87.9        | 21,813,779 | 21,814,004 |
| RM6832   | P | K | 3 | 88.7-89.2   | 22,203,275 | 22,203,510 |
| RM5532   | P | K | 3 | 91.1-94.9   | 23,214,450 | 23,214,675 |
| RM6266   | P | K | 3 | 94.9        | 23,624,297 | 23,624,523 |
| RM5626-1 | P | K | 3 | 99          | 24,671,160 | 24,671,392 |
| RM3513   | P | K | 3 | 99.6        | 24,919,450 | 24,919,705 |
| RM2334   | P | K | 3 | 115.6       | 26,547,297 | 26,547,546 |
| RM7097   | p | K | 3 | 115.6-119.7 | 26,680,895 | 26,681,122 |
| RM6736   | p | K | 3 | 120.1-120.4 | 27,123,477 | 27,123,736 |
| RM5286   | p | K | 3 | 120.1-120.4 | 27,124,226 | 27,124,336 |
| RM6053   | p | K | 3 | 120.4       | 27,187,804 | 27,188,033 |
| RM2614   | P | K | 3 | 120.4       | 27,226,150 | 27,226,409 |
| RM1350-1 | P | K | 3 | 126.8       | 28,479,732 | 28,479,977 |
| RM3856-1 | P | K | 3 | 127.1       | 28,578,685 | 28,578,934 |
| RM3525   | P | K | 3 | 136.5       | 30,192,760 | 30,193,025 |
| RM3199   | p | K | 3 | 137.6       | 30,221,109 | 30,221,332 |
| RM5172   | p | K | 3 | 137.6       | 30,227,926 | 30,228,201 |
| RM5992   | p | K | 3 | 137.9       | 30,321,746 | 30,321,969 |
| RM5475-1 | p | K | 3 | 137.9       | 30,375,989 | 30,376,230 |
| RM3829   | P | K | 3 | 138.7       | 30,629,149 | 30,629,328 |
| RM5995   | p | K | 3 | 139.8       | 30,744,563 | 30,744,786 |
| RM5813   | p | K | 3 | 139.8       | 30,780,012 | 30,780,244 |
| RM6781   | P | K | 3 | 139.8       | 30,840,136 | 30,840,365 |
| RM3867   | P | K | 3 | 142.3       | 31,539,971 | 31,540,230 |
| RM6508   | P | K | 3 | 144.5       | 31,777,994 | 31,778,217 |
| RM1238   | P | K | 3 | 144.5       | 31,870,830 | 31,871,059 |
| RM6090-1 | p | K | 3 | 144.5       | 31,995,629 | 31,995,858 |
| RM6759   | p | K | 3 | 144.5       | 32,016,762 | 32,017,201 |
| RM6970   | P | K | 3 | 146.1       | 32,230,635 | 32,230,870 |
| RM3346   | p | N | 3 | 151.5       | 33,111,110 | 33,111,339 |
| RM3564   | p | N | 3 | 151.5       | 33,218,161 | 33,218,384 |
| RM1373   | P | N | 3 | 151.1       | 33,502,902 | 33,503,169 |
| RM7000   | P | N | 3 | 151.5-152.0 | 33,589,153 | 33,589,400 |
| RM6712   | P | K | 3 | 157.7       | 35,019,905 | 35,020,128 |
| RM6135   | P | K | 3 | 157.7       | 35,050,523 | 35,050,746 |
| RM2187   | P | K | 3 | 158.2       | 35,403,133 | 35,403,378 |
| RM1221   | P | K | 3 | 159         | 35,462,884 | 35,463,113 |
| RM7389   | P | K | 3 | 164.4       | 35,948,417 | 35,948,644 |
| RM1867   | p | K | 4 | 5.4-6.5     | 913,815    | 914,037    |
| RM2416   | P | K | 4 | 6.5         | 941,058    | 941,306    |
| RM3892   | P | K | 4 | 6.8         | 1,123,538  | 1,123,705  |
| RM7535   | p | K | 4 | 6.8         | 1,159,274  | 1,159,505  |
| RM5414   | P | K | 4 | 7.9         | 2,021,661  | 2,021,890  |
| RM2811   | P | K | 4 | 7.9         | 2,074,173  | 2,074,440  |
| RM6770   | p | K | 4 | 8.7-10.1    | 2,813,060  | 2,813,283  |
| RM7200   | P | K | 4 | 10.1-11.0   | 4,019,201  | 4,019,432  |
| RM3658   | p | K | 4 | 14.3-16.7   | 5,573,576  | 5,573,803  |
| RM1305   | p | K | 4 | 14.3-16.7   | 5,624,391  | 5,624,626  |
| RM3471   | P | K | 4 | 16.7-18.3   | 6,279,384  | 6,279,625  |
| RM6659   | P | K | 4 | 16.7-18.3   | 6,541,721  | 6,541,962  |
| RM7279   | p | K | 4 | 23.3        | 13,825,426 | 13,825,669 |
| RM5687   | P | K | 4 | 25.4        | 15,927,714 | 15,927,964 |
| RM3308   | p | K | 4 | 44.0-48.3   | 19,186,523 | 19,186,750 |
| RM1205   | p | K | 4 | 49.7-52.6   | 19,643,655 | 19,643,882 |
| RM5586   | P | K | 4 | 52.6-56.1   | 19,908,585 | 19,908,844 |
| RM3742   | p | K | 4 | 52.6-56.1   | 19,925,163 | 19,925,396 |
| RM1359-1 | p | K | 4 | 56.1        | 20,041,055 | 20,041,304 |
| RM3643   | p | K | 4 | 57.5        | 20,128,592 | 20,128,819 |
| RM5749   | P | K | 4 | 57.5        | 20,131,093 | 20,131,316 |
| RM5424   | p | K | 4 | 58.9-60.2   | 20,608,484 | 20,608,715 |
| RM3397   | P | K | 4 | 58.9-60.2   | 20,633,258 | 20,633,487 |
| RM7313   | p | K | 4 | 60.2        | 20,678,759 | 20,678,982 |
| RM3708   | p | K | 4 | 60.2-62.1   | 20,839,761 | 20,839,990 |
| RM5635   | P | K | 4 | 60.2-62.1   | 20,889,764 | 20,889,999 |
| RM5757   | p | K | 4 | 62.6        | 21,425,081 | 21,425,304 |
| RM3042   | P | K | 4 | 70.1        | 22,992,712 | 22,992,997 |
| RM2521   | P | K | 4 | 70.1-70.6   | 23,193,020 | 23,193,175 |
| RM3866   | P | K | 4 | 70.6        | 23,333,612 | 23,333,869 |
| RM6351   | P | K | 4 | 70.6        | 23,395,720 | 23,395,946 |
| RM6540   | p | K | 4 | 72          | 23,601,879 | 23,602,102 |
| RM3785   | P | K | 4 | 74.5        | 24,222,826 | 24,223,063 |
| RM3367   | P | K | 4 | 74.5        | 24,260,161 | 24,260,392 |
| RM7051   | P | K | 4 | 74.5        | 24,277,159 | 24,277,386 |
| RM5270   | P | K | 4 | 76.8        | 24,989,024 | 24,989,169 |
| RM1388-1 | P | K | 4 | 77.9        | 25,195,510 | 25,195,801 |
| RM1223-1 | P | K | 4 | 78.2        | 25,451,328 | 25,451,557 |
| RM1354   | P | K | 4 | 78.2-81.7   | 26,272,426 | 26,272,671 |
| RM3735   | p | K | 4 | 81.7        | 26,369,272 | 26,369,503 |
| RM5714-1 | P | K | 4 | 84.1-85.2   | 27,446,610 | 27,446,893 |
| RM3288-1 | p | K | 4 | 85.2        | 27,516,134 | 27,516,361 |
| RM6454   | p | K | 4 | 85.2        | 27,541,137 | 27,541,360 |
| RM3092   | P | K | 4 | 85.5        | 27,691,541 | 27,691,684 |
| RM3820   | P | K | 4 | 85.5-87.1   | 27,782,114 | 27,782,353 |
| RM2636   | P | K | 4 | 87.1        | 28,004,458 | 28,004,575 |
| RM2441   | P | K | 4 | 87.1        | 28,020,750 | 28,021,003 |
| RM7210   | P | K | 4 | 87.1-94.4   | 28,613,163 | 28,613,398 |
| RM3781   | P | K | 4 | 87.1-94.4   | 28,731,315 | 28,731,550 |
| RM3916   | P | K | 4 | 87.1-94.4   | 28,733,205 | 28,733,456 |
| RM6089   | P | K | 4 | 97.7        | 29,563,436 | 29,563,665 |
| RM6480   | P | K | 4 | 97.7-99.3   | 29,852,136 | 29,852,362 |
| RM7208   | P | K | 4 | 99.3-100.7  | 30,175,635 | 30,175,865 |
| RM5503-1 | P | K | 4 | 100.7       | 30,397,605 | 30,397,858 |
| RM3276   | p | K | 4 | 102.1       | 30,715,662 | 30,715,887 |
| RM6748   | P | K | 4 | 102.7       | 30,902,069 | 30,902,346 |
| RM5511   | P | K | 4 | 102.7-107.4 | 31,146,772 | 31,147,072 |
| RM3534   | P | K | 4 | 102.7-107.4 | 31,197,968 | 31,198,191 |
| RM1250   | P | K | 4 | 102.7-107.4 | 31,296,033 | 31,296,264 |
| RM3687   | p | K | 4 | 107.4       | 31,517,487 | 31,517,716 |
| RM5473-1 | P | K | 4 | 108.2       | 31,710,397 | 31,710,636 |

|          |   |   |   |             |            |            |
|----------|---|---|---|-------------|------------|------------|
| RM3843   | P | K | 4 | 108.2       | 31,717,525 | 31,717,770 |
| RM6629   | P | K | 4 | 108.2       | 31,778,484 | 31,778,707 |
| RM3836   | P | K | 4 | 108.2-109.9 | 31,845,434 | 31,845,677 |
| RM5709-1 | P | K | 4 | 109.9       | 32,094,491 | 32,094,762 |
| RM6909   | P | K | 4 | 109.9       | 32,094,493 | 32,094,764 |
| RM3335-1 | p | K | 4 | 113.2       | 33,060,223 | 33,060,452 |
| RM1153   | p | K | 4 | 113.2       | 33,065,542 | 33,065,767 |
| RM3306   | p | K | 4 | 113.2       | 33,106,363 | 33,106,590 |
| RM3648   | p | K | 4 | 114.3       | 33,340,360 | 33,340,587 |
| RM5506   | P | K | 4 | 114.3-120.3 | 33,526,172 | 33,526,433 |
| RM3466   | P | K | 4 | 120.3-122.9 | 34,083,728 | 34,083,965 |
| RM1113   | P | K | 4 | 122.9       | 34,304,852 | 34,305,075 |
| RM2799   | P | K | 4 | 122.9       | 34,354,663 | 34,354,932 |
| RM1112   | P | K | 4 | 123.8-128.5 | 34,456,250 | 34,456,473 |
| RM7172   | P | K | 4 | 123.8-128.5 | 34,630,150 | 34,630,373 |
| RM3310   | P | K | 4 | 123.8-128.5 | 34,765,869 | 34,766,096 |
| RM3399   | P | K | 4 | 128.5       | 34,916,550 | 34,916,783 |
| RM6006   | P | K | 4 | 128.5       | 34,927,078 | 34,927,301 |
| RM3332   | p | K | 4 | 128.5       | 34,936,709 | 34,936,938 |
| RM6473   | p | K | 4 | 129.1       | 35,024,170 | 35,024,396 |
| RM1841   | P | K | 4 | 129.6       | 35,139,756 | 35,139,983 |
| RM2431   | P | K | 4 | 129.6       | 35,139,856 | 35,139,983 |
| RM7030   | P | K | 4 | 129.6       | 35,411,625 | 35,411,856 |
| RM1248   | P | K | 5 | 0-0.3       | 62,566     | 62,795     |
| RM3529   | P | K | 5 | 0-3.0       | 82,024     | 82,301     |
| RM4777   | P | K | 5 | 4.6         | 422,042    | 422,303    |
| RM5693   | P | K | 5 | 4.6         | 432,449    | 432,702    |
| RM3796   | P | K | 5 | 4.6         | 456,790    | 457,027    |
| RM7029   | P | K | 5 | 6.5         | 537,755    | 537,982    |
| RM6300   | P | K | 5 | 6.5         | 568,859    | 569,082    |
| RM1258   | P | K | 5 | 9.5         | 782,886    | 783,117    |
| RM1200   | P | K | 5 | 9.5         | 804,892    | 805,119    |
| RM2010   | P | K | 5 | 12          | 1,120,521  | 1,120,758  |
| RM1024   | P | K | 5 | 14.1        | 1,174,275  | 1,174,500  |
| RM6317   | P | K | 5 | 14.1-17.9   | 1,462,168  | 1,462,403  |
| RM5579-1 | P | K | 5 | 19.0-20.1   | 1,855,846  | 1,856,089  |
| RM7302   | p | K | 5 | 20.1        | 1,917,441  | 1,917,664  |
| RM3345   | p | K | 5 | 20.1        | 1,951,290  | 1,951,519  |
| RM2488   | P | K | 5 | 21.1        | 2,085,089  | 2,085,344  |
| RM4710   | P | K | 5 | 21.1        | 34,876,210 | 34,876,459 |
| RM6517   | p | K | 5 | 24.7        | 2,853,215  | 2,853,438  |
| RM1366   | P | K | 5 | 24.7        | 2,855,477  | 2,855,728  |
| RM3322   | p | K | 5 | 32          | 4,203,647  | 4,203,874  |
| RM5994   | p | K | 5 | 45.8        | 6,798,566  | 6,798,789  |
| RM4837   | P | K | 5 | 46.9        | 6,932,208  | 6,932,463  |
| RM2422   | P | K | 5 | 46.9        | 6,937,938  | 6,938,189  |
| RM4691   | P | K | 5 | 46.9        | 6,941,234  | 6,941,483  |
| RM6034   | p | K | 5 | 46.9        | 6,949,404  | 6,949,630  |
| RM3683   | p | K | 5 | 47.2        | 7,091,499  | 7,091,728  |
| RM2998   | P | K | 5 | 47.2        | 7,150,222  | 7,150,496  |
| RM3381   | P | K | 5 | 53.5-54.3   | 9,485,561  | 9,485,792  |
| RM2676   | P | K | 5 | 54.6        | 13,403,771 | 13,404,034 |
| RM5140   | P | K | 5 | 54.6        | 13,408,182 | 13,408,449 |
| RM6229   | P | K | 5 | 54.6-55.4   | 13,472,890 | 13,473,125 |
| RM6724   | P | K | 5 | 54.6-55.4   | 13,697,171 | 13,697,409 |
| RM6742   | P | K | 5 | 55.4-58.7   | 14,743,587 | 14,743,852 |
| RM6645   | P | K | 5 | 58.7        | 14,944,703 | 14,944,926 |
| RM6024   | p | K | 5 | 67.5        | 17,668,464 | 17,668,687 |
| RM6025   | p | K | 5 | 67.5        | 17,725,795 | 17,726,018 |
| RM1237   | P | K | 5 | 67.5        | 17,872,276 | 17,872,505 |
| RM4743   | p | K | 5 | 70.5-73.9   | 18,293,492 | 18,293,741 |
| RM1868   | P | K | 5 | 70.5-73.9   | 18,314,564 | 18,314,797 |
| RM6621   | P | K | 5 | 70.5-73.9   | 18,698,659 | 18,698,888 |
| RM7568   | p | K | 5 | 75          | 19,346,191 | 19,346,414 |
| RM3160   | P | K | 5 | 75.0-77.4   | 19,899,341 | 19,899,616 |
| RM1386   | P | K | 5 | 75.0-77.4   | 19,912,853 | 19,913,136 |
| RM5329   | P | K | 5 | 75.0-77.4   | 19,947,140 | 19,947,363 |
| RM4674   | P | K | 5 | 77.4-78.2   | 20,179,619 | 20,179,866 |
| RM3351-1 | P | K | 5 | 80.7        | 20,614,960 | 20,615,189 |
| RM6954   | p | K | 5 | 89.6        | 21,936,521 | 21,936,744 |
| RM4501   | P | K | 5 | 89.6        | 21,968,652 | 21,968,891 |
| RM5592   | P | K | 5 | 89.6        | 21,970,375 | 21,970,684 |
| RM5401   | P | K | 5 | 92          | 22,144,559 | 22,144,786 |
| RM3295   | P | K | 5 | 92.0-94.5   | 22,187,343 | 22,187,570 |
| RM3759   | P | K | 5 | 92.0-94.5   | 22,246,799 | 22,247,032 |
| RM1271   | P | K | 5 | 92.0-94.5   | 22,333,136 | 22,333,367 |
| RM6841   | P | K | 5 | 95.3        | 22,657,355 | 22,657,614 |
| RM6054   | P | K | 5 | 95.3        | 22,696,622 | 22,696,857 |
| RM3870   | P | K | 5 | 95.8        | 22,817,695 | 22,817,958 |
| RM5311   | P | K | 5 | 95.8        | 22,828,446 | 22,828,669 |
| RM5575   | P | K | 5 | 96.4        | 23,264,008 | 23,264,247 |
| RM6598   | P | K | 5 | 101.5-102.8 | 23,980,978 | 23,981,201 |
| RM6545   | P | K | 5 | 103.9       | 24,789,244 | 24,789,470 |
| RM3348   | P | K | 5 | 104.4       | 24,948,876 | 24,949,105 |
| RM3620   | P | K | 5 | 104.4       | 25,065,844 | 25,066,069 |
| RM6972   | P | K | 5 | 104.7       | 25,208,247 | 25,208,485 |
| RM3321   | p | K | 5 | 107.4       | 25,645,910 | 25,646,137 |
| RM3616   | p | K | 5 | 108.5       | 26,137,352 | 26,137,577 |
| RM3809   | P | K | 5 | 108.5       | 26,444,182 | 26,444,421 |
| RM2357   | P | K | 5 | 109         | 26,712,644 | 26,712,893 |
| RM7452   | p | K | 5 | 110.4       | 26,782,938 | 26,783,173 |
| RM7473   | p | K | 5 | 110.4       | 26,801,148 | 26,801,399 |
| RM5784   | P | K | 5 | 112.4-115.7 | 27,637,400 | 27,637,656 |
| RM3170   | P | K | 5 | 115.7       | 27,796,335 | 27,796,558 |
| RM6360-1 | p | K | 5 | 115.7       | 27,924,566 | 27,924,798 |
| RM6339   | p | K | 5 | 116.2       | 27,931,838 | 27,932,061 |
| RM6313   | P | K | 5 | 116.5       | 28,120,099 | 28,120,331 |
| RM6822   | P | K | 5 | 122.2       | 29,041,757 | 29,041,983 |
| RM3068   | P | K | 5 | 122.3       | 29,093,932 | 29,094,224 |
| RM8039   | P | K | 5 | 55          |            |            |
| RM6273   | P | N | 6 | 0.6         | 130,334    | 130,566    |
| RM6775   | P | N | 6 | 0.6         | 208,954    | 209,177    |
| RM7158   | P | N | 6 | 0.6         | 216,256    | 216,503    |

|          |   |   |   |             |            |            |
|----------|---|---|---|-------------|------------|------------|
| RM6467   | P | N | 6 | 0.6         | 219,965    | 220,188    |
| RM8116   | P | N | 6 | 0.9         |            |            |
| RM8117   | P | N | 6 | 0.9         |            |            |
| RM8120   | P | N | 6 | 0.9         |            |            |
| RM8121   | P | N | 6 | 0.9         |            |            |
| RM3353   | P | N | 6 | 1.4         | 435,548    | 435,777    |
| RM8107   | P | N | 6 | 1.7         |            |            |
| RM8109   | P | N | 6 | 1.7         |            |            |
| RM4332   | P | N | 6 | 3.1         | 720,912    | 721,046    |
| RM8060   | P | N | 6 | 3.1         |            |            |
| RM2353   | P | N | 6 | 3.6         | 1,064,340  | 1,064,597  |
| RM8072   | P | N | 6 | 6           |            |            |
| RM1369   | P | N | 6 | 6.6         | 1,562,558  | 1,562,811  |
| RM8101   | P | N | 6 | 6.9         |            |            |
| RM5199   | P | N | 6 | 10.4        | 2,270,117  | 2,270,231  |
| RM3805   | P | N | 6 | 11.5        | 2,853,003  | 2,853,240  |
| RM3414   | P | N | 6 | 11.5        | 2,881,700  | 2,881,933  |
| RM8125   | P | N | 6 | 12.9        |            |            |
| RM6917   | P | N | 6 | 15.5        | 4,079,317  | 4,079,591  |
| RM4608   | P | N | 6 | 15.5        | 4,314,970  | 4,315,215  |
| RM6176   | P | N | 6 | 15.8-18.0   | 4,623,091  | 4,623,314  |
| RM6194   | P | H | 6 | 32.7        | 6,069,977  | 6,070,200  |
| RM7488-1 | P | N | 6 | 38.3-40.2   | 7,010,907  | 7,011,134  |
| RM3431-1 | P | H | 6 | 51.0-53.5   | 8,756,703  | 8,756,937  |
| RM3431A  | P | H | 6 | 51.0-53.5   | 8,756,703  | 8,756,937  |
| RM5963-1 | P | H | 6 | 51.0-53.5   | 8,826,389  | 8,826,615  |
| RM6302   | P | K | 6 | 53.5        | 8,984,467  | 8,984,690  |
| RM6162   | P | K | 6 | 53.8        | 9,210,045  | 9,210,274  |
| RM6836-1 | P | K | 6 | 54.1        | 9,320,722  | 9,320,963  |
| RM7311   | P | K | 6 | 58.7-61.6   | 10,889,390 | 10,889,613 |
| RM3183   | P | K | 6 | 64.6        | 12,290,840 | 12,291,063 |
| RM5745   | p | K | 6 | 64.9        | 12,336,809 | 12,337,035 |
| RM1161   | P | K | 6 | 65.8        | 13,595,858 | 13,596,083 |
| RM6818   | p | K | 6 | 65.8        | 16,364,235 | 16,364,461 |
| RM5087   | P | K | 6 | 65.8        | 16,459,600 | 16,459,869 |
| RM3207   | P | K | 6 | 65.8        | 17,517,626 | 17,517,765 |
| RM7193   | P | K | 6 | 70.9        | 19,910,824 | 19,911,051 |
| RM3187   | p | K | 6 | 72.9        | 20,578,902 | 20,579,125 |
| RM3498   | P | K | 6 | 73.2        | 20,634,084 | 20,634,333 |
| RM3827-1 | P | K | 6 | 79          | 21,950,302 | 21,950,543 |
| RM1340-1 | P | K | 6 | 82.9        | 22,960,533 | 22,960,776 |
| RM3272   | P | K | 6 | 84.5-85.4   | 23,237,160 | 23,237,385 |
| RM6298   | P | K | 6 | 85.4        | 23,353,466 | 23,353,689 |
| RM7434   | P | K | 6 | 87.5        | 23,552,127 | 23,552,366 |
| RM6202   | P | K | 6 | 87.5-90.5   | 23,878,153 | 23,878,376 |
| RM3279   | P | K | 6 | 87.5-90.5   | 23,942,014 | 23,942,239 |
| RM5957   | P | K | 6 | 90.5        | 24,138,791 | 24,139,014 |
| RM5371   | P | K | 6 | 96.5        | 25,442,711 | 25,442,936 |
| RM6395   | P | K | 6 | 99.2        | 25,612,810 | 25,613,039 |
| RM6782   | P | K | 6 | 99.2        | 25,662,572 | 25,662,801 |
| RM7309   | p | K | 6 | 100.3       | 25,914,609 | 25,914,836 |
| RM6274   | P | K | 6 | 100.3       | 25,935,738 | 25,935,970 |
| RM3138   | P | K | 6 | 110.6       | 28,086,362 | 28,086,593 |
| RM7555-1 | P | K | 6 | 117         | 29,054,809 | 29,055,056 |
| RM3343   | P | K | 6 | 117         | 29,099,681 | 29,099,910 |
| RM3765   | P | K | 6 | 117.0-119.2 | 29,207,571 | 29,207,806 |
| RM3509   | P | K | 6 | 124.4       | 30,456,026 | 30,456,277 |
| RM5463-1 | p | K | 6 | 124.4       | 30,470,062 | 30,470,299 |
| RM4584   | P | K | 7 | 2.2         | 494,849    | 495,092    |
| RM6047   | P | K | 7 | 3.9         | 741,838    | 742,067    |
| RM7454   | P | K | 7 | 4.4         | 1,102,252  | 1,102,479  |
| RM3831   | P | K | 7 | 5.2         | 1,164,715  | 1,164,958  |
| RM1085   | P | K | 7 | 5.8         | 1,243,095  | 1,243,354  |
| RM3222   | P | K | 7 | 6.4-7.0     | 1,733,194  | 1,733,417  |
| RM5100   | P | K | 7 | 9.6         | 2,249,684  | 2,249,953  |
| RM3325   | P | K | 7 | 9.6         | 2,250,349  | 2,250,576  |
| RM5752-1 | P | K | 7 | 11          | 2,599,925  | 2,600,163  |
| RM5055   | P | K | 7 | 11          | 2,682,147  | 2,682,414  |
| RM5711-1 | p | K | 7 | 24.2        | 3,174,256  | 3,174,527  |
| RM1353-1 | P | K | 7 | 24.8        | 3,344,916  | 3,345,163  |
| RM1243   | P | K | 7 | 25.4        | 3,587,770  | 3,587,999  |
| RM7479-1 | p | K | 7 | 31          | 4,167,672  | 4,167,895  |
| RM2006   | P | K | 7 | 31.0-35.7   | 4,230,099  | 4,230,336  |
| RM3484   | P | K | 7 | 31.0-35.7   | 4,452,024  | 4,452,267  |
| RM8008   | P | K | 7 | 31.0-35.7   |            |            |
| RM8009   | P | K | 7 | 31.0-35.7   |            |            |
| RM6872   | P | K | 7 | 35.7        | 4,692,510  | 4,692,733  |
| RM6574   | P | K | 7 | 38.4        | 4,714,940  | 4,715,166  |
| RM7121   | P | K | 7 | 41.7        | 5,656,003  | 5,656,226  |
| RM6728   | P | K | 7 | 41.7-42.6   | 5,762,130  | 5,762,377  |
| RM5672   | P | K | 7 | 44.1        | 6,413,118  | 6,413,356  |
| RM1253   | p | K | 7 | 45.2        | 7,000,946  | 7,001,177  |
| RM8006   | P | K | 7 | 46.5-47.1   |            |            |
| RM7153   | P | K | 7 | 48.0-49.4   | 8,640,555  | 8,640,786  |
| RM3859   | p | K | 7 | 49.4        | 8,910,348  | 8,910,603  |
| RM7074   | p | K | 7 | 49.4        | 9,043,858  | 9,044,109  |
| RM5436   | p | K | 7 | 49.7        | 9,107,816  | 9,108,049  |
| RM5499   | p | K | 7 | 49.7        | 10,020,317 | 10,020,566 |
| RM3635   | P | K | 7 | 49.7        | 11,120,425 | 11,120,650 |
| RM3832   | P | K | 7 | 49.7        | 12,659,408 | 12,659,651 |
| RM1377   | P | K | 7 | 49.7        | 12,730,866 | 12,731,129 |
| RM7273   | P | K | 7 | 50          | 13,377,037 | 13,377,268 |
| RM3670   | P | K | 7 | 50          | 13,386,282 | 13,386,509 |
| RM8036   | p | K | 7 | 50          |            |            |
| RM8037   | p | K | 7 | 50          |            |            |
| RM7184   | p | K | 7 | 50.0-50.9   | 14,489,038 | 14,489,261 |
| RM2878   | p | K | 7 | 50.0-50.9   | 14,584,027 | 14,584,300 |
| RM3755   | P | K | 7 | 50.9        | 14,680,895 | 14,681,128 |
| RM5543   | P | K | 7 | 53.4-55.6   | 15,699,515 | 15,699,742 |
| RM5481-1 | P | K | 7 | 55.6        | 16,146,408 | 16,146,649 |
| RM7110-1 | p | K | 7 | 56.2        | 16,800,663 | 16,800,898 |
| RM1135   | p | K | 7 | 57.5        | 16,879,357 | 16,879,580 |
| RM3795   | P | K | 7 | 57.5-60.8   | 17,132,816 | 17,133,053 |

|          |   |   |   |            |            |            |
|----------|---|---|---|------------|------------|------------|
| RM6767-1 | P | K | 7 | 60.8       | 17,417,522 | 17,417,781 |
| RM6394   | P | K | 7 | 61.9       | 18,340,234 | 18,340,460 |
| RM3300   | P | K | 7 | 62.4-67.0  | 18,908,937 | 18,909,164 |
| RM3691   | P | K | 7 | 67         | 19,172,490 | 19,172,719 |
| RM3743   | p | K | 7 | 67         | 19,290,447 | 19,290,680 |
| RM5420   | P | K | 7 | 67         | 19,304,394 | 19,304,621 |
| RM7087   | P | K | 7 | 67         | 19,304,765 | 19,304,988 |
| RM5583   | P | K | 7 | 67         | 19,307,849 | 19,308,100 |
| RM2966   | P | K | 7 | 67.0-69.2  | 19,681,525 | 19,681,713 |
| RM3404-1 | P | K | 7 | 70         | 20,053,245 | 20,053,478 |
| RM1279   | P | K | 7 | 75.6       | 21,561,321 | 21,561,554 |
| RM3799   | p | K | 7 | 76.2       | 21,578,202 | 21,578,439 |
| RM5495-1 | P | K | 7 | 76.7-78.9  | 21,999,223 | 21,999,470 |
| RM6152   | P | K | 7 | 78.9       | 22,074,885 | 22,075,111 |
| RM6403   | p | K | 7 | 78.9       | 22,117,990 | 22,118,213 |
| RM2752   | P | K | 7 | 78.9-80.5  | 22,498,355 | 22,498,624 |
| RM6885   | P | K | 7 | 81.1       | 22,955,547 | 22,955,770 |
| RM6432   | P | K | 7 | 81.4       | 23,107,080 | 23,107,309 |
| RM3753-1 | P | K | 7 | 81.9       | 23,607,562 | 23,607,795 |
| RM1365   | P | K | 7 | 81.9-83.3  | 23,737,026 | 23,737,277 |
| RM6042   | p | K | 7 | 81.9-83.3  | 23,872,325 | 23,872,551 |
| RM5397   | P | K | 7 | 81.9-83.3  | 23,899,674 | 23,899,901 |
| RM1132   | P | K | 7 | 83.3       | 23,931,837 | 23,932,060 |
| RM6326   | P | K | 7 | 83.3-84.1  | 24,142,506 | 24,142,759 |
| RM6420   | p | K | 7 | 88.7       | 24,735,086 | 24,735,309 |
| RM6344   | p | K | 7 | 89.8       | 24,910,592 | 24,910,815 |
| RM1330-1 | P | K | 7 | 94.7       | 25,603,900 | 25,604,139 |
| RM5426   | P | K | 7 | 96.1       | 25,877,964 | 25,878,195 |
| RM7054   | p | K | 7 | 98.2       | 26,300,919 | 26,301,142 |
| RM6216   | P | K | 7 | 98.2       | 26,343,822 | 26,344,048 |
| RM5455   | P | K | 7 | 99.3       | 26,408,285 | 26,408,520 |
| RM3555   | P | K | 7 | 105.7      | 27,837,942 | 27,838,165 |
| RM5720   | P | K | 7 | 115.5      | 28,616,399 | 28,616,700 |
| RM7601   | p | K | 7 | 116.6      | 28,985,910 | 28,986,137 |
| RM6357-1 | P | K | 7 | 118.6      | 29,495,046 | 29,495,276 |
| RM5911   | P | K | 8 | 0          | 69,028     | 69,293     |
| RM6369   | P | K | 8 | 0          | 119,238    | 119,479    |
| RM2680   | P | K | 8 | 0.5        | 141,310    | 141,573    |
| RM1019   | P | K | 8 | 0.5        | 195,955    | 196,180    |
| RM1959   | P | K | 8 | 1.6        | 259,219    | 259,456    |
| RM1381-1 | P | K | 8 | 3          | 417,847    | 418,108    |
| RM6925   | P | K | 8 | 3.6        | 641,650    | 641,939    |
| RM1235-1 | P | K | 8 | 13.1       | 1,203,331  | 1,203,550  |
| RM6356   | P | K | 8 | 13.4       | 1,555,391  | 1,555,620  |
| RM6863   | P | K | 8 | 16.4       | 2,005,890  | 2,006,116  |
| RM8018   | P | K | 8 | 16.7       |            |            |
| RM5647   | P | K | 8 | 21.6-25.2  | 2,886,460  | 2,886,592  |
| RM4955   | P | K | 8 | 25.2       | 2,953,386  | 2,953,645  |
| RM3819   | P | K | 8 | 25.2       | 3,009,695  | 3,009,934  |
| RM1270-1 | P | K | 8 | 25.2-26.3  | 3,075,093  | 3,075,324  |
| RM5434   | P | K | 8 | 25.2       | 3,118,660  | 3,118,891  |
| RM1376   | p | K | 8 | 26.3       | 3,162,515  | 3,162,776  |
| RM5428   | p | K | 8 | 27.1       | 3,246,672  | 3,246,903  |
| RM1148   | p | K | 8 | 31.6       | 3,733,709  | 3,733,932  |
| RM3572   | p | K | 8 | 32.7       | 3,921,948  | 3,922,171  |
| RM6999   | P | K | 8 | 32.7       | 3,978,833  | 3,979,077  |
| RM5432   | p | K | 8 | 34.6-35.7  | 4,371,964  | 4,372,195  |
| RM4085   | p | K | 8 | 35.7       | 4,443,863  | 4,444,088  |
| RM3791   | P | K | 8 | 35.7       | 4,510,395  | 4,510,632  |
| RM5556   | P | K | 8 | 36         | 4,583,090  | 4,583,319  |
| RM3374   | P | K | 8 | 36.8       | 4,725,654  | 4,725,886  |
| RM1111   | P | K | 8 | 36.8       | 4,767,350  | 4,767,573  |
| RM5808   | p | K | 8 | 36.8       |            |            |
| RM7080   | p | K | 8 | 36.8       | 4,694,512  | 4,694,735  |
| RM6208   | p | K | 8 | 40.2-42.9  | 5,782,632  | 5,782,855  |
| RM6838   | P | K | 8 | 42.9       | 5,844,143  | 5,844,384  |
| RM3507   | P | K | 8 | 44.6-45.4  | 6,152,837  | 6,153,088  |
| RM3644   | p | K | 8 | 44.6-45.4  | 6,199,529  | 6,199,756  |
| RM2584   | P | K | 8 | 45.4-45.8  |            |            |
| RM3181   | p | K | 8 | 45.4-45.8  | 7,547,366  | 7,547,587  |
| RM8019   | P | K | 8 | 45.84      |            |            |
| RM6429   | p | K | 8 | 48.8-49.2  | 8,379,004  | 8,379,230  |
| RM3835   | P | K | 8 | 50.5       | 8,573,657  | 8,573,900  |
| RM3481   | P | K | 8 | 50.8-52.1  | 9,129,774  | 9,130,017  |
| RM6010   | P | K | 8 |            | 9,478,523  | 9,478,746  |
| RM3395   | P | K | 8 | 52.9       | 10,288,396 | 10,288,629 |
| RM5514   | P | K | 8 | 52.9-53.7  | 10,401,871 | 10,402,094 |
| RM3662   | P | K | 8 | 54.0-54.3  | 11,721,092 | 11,721,319 |
| RM1384-1 | P | K | 8 | 54.0-54.3  | 11,842,578 | 11,842,849 |
| RM6032   | P | K | 8 | 54.0-54.3  | 11,890,094 | 11,890,317 |
| RM3383   | p | K | 8 | 54.3       | 13,478,659 | 13,478,890 |
| RM6990   | P | K | 8 | 54.3       | 14,355,543 | 14,355,766 |
| RM6382   | p | K | 8 | 58.7-59.0  | 16,911,930 | 16,912,153 |
| RM7285   | P | K | 8 | 61.2-66.5  | 18,756,284 | 18,756,543 |
| RM5767   | P | K | 8 | 61.2-66.5  | 18,814,305 | 18,814,531 |
| RM3153-1 | P | K | 8 | 66.5       | 18,982,379 | 18,982,628 |
| RM4815   | P | K | 8 | 66.5       | 19,001,947 | 19,002,202 |
| RM6215   | P | K | 8 | 66.5       | 19,058,482 | 19,058,708 |
| RM7191   | P | K | 8 | 67.3-70.1  | 19,598,375 | 19,598,602 |
| RM6187-1 | P | K | 8 | 72.2       | 20,474,153 | 20,474,376 |
| RM3459   | P | K | 8 | 75.7       | 20,645,513 | 20,645,752 |
| RM5351-1 | P | K | 8 | 76.7       | 20,825,098 | 20,825,323 |
| RM1578-1 | P | K | 8 | 76.7-78.5  | 20,966,809 | 20,966,937 |
| RM5887-1 | P | K | 8 | 76.7-78.5  | 20,971,607 | 20,971,836 |
| RM7356   | P | K | 8 | 78.5       | 21,275,442 | 21,275,665 |
| RM3634   | P | K | 8 | 80.7-82.8  | 21,575,792 | 21,576,017 |
| RM6635   | P | K | 8 | 85.1       | 22,166,005 | 22,166,234 |
| RM7556   | P | K | 8 | 86.7       | 22,202,467 | 22,202,694 |
| RM3262   | p | K | 8 | 86.7       | 22,373,934 | 22,374,159 |
| RM6976   | P | K | 8 | 92.2       | 23,551,098 | 23,551,342 |
| RM5485   | P | K | 8 | 92.2-96.6  | 24,065,608 | 24,065,851 |
| RM8058   | P | K | 8 | 99.1       |            |            |
| RM3845   | p | K | 8 | 99.1-102.1 | 24,755,418 | 24,755,663 |



|          |   |   |    |             |            |            |
|----------|---|---|----|-------------|------------|------------|
| RM4487   | P | K | 8  | 107.7       | 26,080,816 | 26,081,055 |
| RM1345   | P | K | 8  | 107.7       | 26,140,324 | 26,140,569 |
| RM5493-1 | P | K | 8  | 107.7       | 26,140,889 | 26,141,136 |
| RM3571   | P | K | 8  | 108.2       | 26,243,549 | 26,243,772 |
| RM7631   | p | K | 8  | 114.4-118.9 | 27,349,912 | 27,350,135 |
| RM5933   | p | K | 8  | 114.4-118.9 | 27,465,770 | 27,466,113 |
| RM6845   | P | K | 8  | 118.9       | 27,555,590 | 27,555,813 |
| RM3120   | P | K | 8  | 119.6       | 27,812,944 | 27,813,167 |
| RM3496-1 | P | K | 8  | 119.6       | 27,834,785 | 27,835,034 |
| RM3155-1 | P | - | 8  | 119.9       | 27,898,003 | 27,898,264 |
| RM3840   | P | K | 8  | 119.9       | 27,919,217 | 27,919,462 |
| RM4153   | P | K | 8  | 120.4       | 28,196,203 | 28,196,440 |
| RM4997   | P | K | 8  | 121.2       | 28,231,273 | 28,231,536 |
| RM4154   | P | K | 8  | 121.2       | 28,238,630 | 28,238,857 |
| RM5545   | P | K | 8  | 121.2       | 28,267,514 | 28,267,742 |
| RM5688   | P | K | 9  | 0.8         | 1,663,450  | 1,663,700  |
| RM3502   | p | K | 9  | 2.1-2.4     | 4,975,086  | 4,975,336  |
| RM5899   | P | K | 9  | 2.1-2.4     | 5,069,962  | 5,070,209  |
| RM6920   | P | K | 9  | 10          | 6,955,519  | 6,955,799  |
| RM5515   | p | K | 9  | 10          | 7,093,619  | 7,093,842  |
| RM1328   | P | K | 9  | 26.7        | 9,152,193  | 9,152,432  |
| RM3855   | P | K | 9  | 26.7-30.6   | 9,316,925  | 9,317,174  |
| RM3907   | p | K | 9  | 34.4        | 10,440,718 | 10,440,957 |
| RM3769   | P | K | 9  | 36          | 11,694,673 | 11,694,908 |
| RM1896   | P | K | 9  | 36          | 11,714,708 | 11,714,827 |
| RM6444   | p | K | 9  | 36.0-40.1   | 11,826,987 | 11,827,210 |
| RM6051   | P | K | 9  | 41.9        | 12,777,595 | 12,777,824 |
| RM6475   | p | K | 9  | 41.9        | 12,786,082 | 12,786,308 |
| RM6839   | P | K | 9  | 50.7        | 14,512,300 | 14,512,550 |
| RM6771   | p | K | 9  | 50.7        | 14,638,336 | 14,638,559 |
| RM5652   | P | K | 9  | 50.7        | 14,731,182 | 14,731,447 |
| RM5122   | P | ? | 9  | 55.3        | 15,194,221 | 15,194,492 |
| RM3700   | P | K | 9  | 55.3        | 15,373,551 | 15,373,780 |
| RM3025   | P | K | 9  | 58.3-60.8   | 16,332,095 | 16,332,378 |
| RM3492   | P | K | 9  | 58.3-60.8   | 16,440,786 | 16,441,033 |
| RM7424   | p | K | 9  | 60.8        | 16,527,050 | 16,527,273 |
| RM6235   | P | K | 9  | 60.8-62.4   | 16,620,710 | 16,620,935 |
| RM7048   | P | K | 9  | 62.4        | 16,881,548 | 16,881,779 |
| RM3600   | p | K | 9  | 62.7        | 17,054,042 | 17,054,267 |
| RM7289   | P | K | 9  | 63          | 17,210,136 | 17,210,427 |
| RM5574   | P | K | 9  | 63.0-65.1   | 17,668,026 | 17,668,265 |
| RM3533   | P | K | 9  | 65.1        | 17,833,742 | 17,833,965 |
| RM5535   | P | K | 9  | 74.7        | 18,935,645 | 18,935,870 |
| RM6460   | P | K | 9  | 74.7        | 18,978,882 | 18,979,105 |
| RM7343   | p | K | 9  | 75          | 19,225,970 | 19,226,193 |
| RM3249   | p | K | 9  | 77.2        | 19,453,932 | 19,454,157 |
| RM6491   | p | K | 9  | 77.2        | 19,454,547 | 19,454,770 |
| RM5786-1 | P | K | 9  | 77.2        | 19,493,602 | 19,493,870 |
| RM3787   | P | K | 9  | 77.7-78.0   | 19,748,455 | 19,748,692 |
| RM3808   | p | K | 9  | 78.8        | 20,246,418 | 20,246,657 |
| RM1553   | P | K | 9  | 82.1        | 20,702,481 | 20,702,706 |
| RM6971   | P | K | 9  | 90.4        | 21,591,726 | 21,591,964 |
| RM5384-1 | P | K | 9  | 90.7-91.5   | 21,766,885 | 21,767,112 |
| RM2915   | p | K | 9  | 90.7-91.5   | 21,784,272 | 21,784,549 |
| RM6816   | p | K | 9  | 91.8        | 21,907,085 | 21,907,311 |
| RM2144   | P | K | 9  | 91.8        | 21,908,523 | 21,908,768 |
| RM6294   | P | K | 9  | 91.8        | 21,983,121 | 21,983,344 |
| RM2482   | P | K | 9  | 93.1        | 22,275,100 | 22,275,347 |
| RM1026   | p | K | 9  | 93.1        | 22,304,231 | 22,304,458 |
| RM6797   | p | K | 9  | 93.5        | 22,412,038 | 22,412,261 |
| RM3744   | P | K | 9  | 93.5        | 22,419,832 | 22,419,964 |
| RM5095   | P | K | 10 | 0.6         | 31,772     | 32,039     |
| RM7492   | P | K | 10 | 0.6         | 33,871     | 34,098     |
| RM6370   | P | K | 10 | 1.1         | 324,345    | 324,586    |
| RM3590   | p | K | 10 | 1.9-2.2     | 1,075,995  | 1,076,218  |
| RM7361   | P | K | 10 | 3           | 1,901,703  | 1,901,930  |
| RM5271   | P | K | 10 | 3.9         | 1,915,539  | 1,915,828  |
| RM6404   | P | K | 10 | 4.4-5.5     | 2,415,410  | 2,415,633  |
| RM3882   | P | K | 10 | 5.5-6.8     | 2,717,427  | 2,717,650  |
| RM7545   | P | K | 10 | 7.6         | 3,785,015  | 3,785,286  |
| RM6565   | P | K | 10 | 11.7-13.3   | 4,616,853  | 4,617,076  |
| RM2504   | P | K | 10 | 15.7        | 7,217,413  | 7,217,668  |
| RM2887   | P | K | 10 | 16.4        | 8,513,956  | 8,514,231  |
| RM1126   | P | K | 10 | 16.8-17.6   | 9,294,322  | 9,294,545  |
| RM3152-1 | P | K | 10 | 17.9        | 9,766,047  | 9,766,215  |
| RM6833   | P | K | 10 | 19.0-21.8   | 10,893,395 | 10,893,630 |
| RM4455   | P | K | 10 | 21.8-23.1   | 11,221,443 | 11,221,682 |
| RM1859   | P | K | 10 | 24.7-26.1   | 13,041,096 | 13,041,230 |
| RM6144   | p | K | 10 | ??          | 15,158,952 | 15,159,178 |
| RM1375   | P | K | 10 | ??          | 16,201,987 | 16,202,248 |
| RM3229   | P | K | 10 | 42.7-44.0   | 16,248,788 | 16,249,011 |
| RM6477   | p | K | 10 | 42.7-44.0   | 16,291,023 | 16,291,249 |
| RM3470   | P | K | 10 | 44.6-45.7   | 16,842,586 | 16,842,827 |
| RM5392   | P | K | 10 | 44.6-45.7   | 16,859,910 | 16,860,137 |
| RM5620   | P | K | 10 | 45.7        | 16,959,830 | 16,960,059 |
| RM1873   | P | K | 10 | 48.4        | 17,379,779 | 17,380,014 |
| RM5274   | P | K | 10 | 48.4        | 17,403,868 | 17,404,002 |
| RM1937   | P | K | 10 | 48.4        | 17,483,380 | 17,483,617 |
| RM6474   | P | K | 10 | 53.3        | 18,183,508 | 18,183,734 |
| RM5629   | P | K | 10 | 53.3-53.6   | 18,230,357 | 18,230,589 |
| RM6737   | P | K | 10 | 53.3-53.6   | 18,268,289 | 18,268,551 |
| RM3510   | P | K | 10 | 54.3        | 18,633,958 | 18,634,211 |
| RM1108   | P | K | 10 | 55.3        | 18,716,263 | 18,716,486 |
| RM6745-1 | P | K | 10 | 55.6        | 18,897,227 | 18,897,405 |
| RM2371   | P | K | 10 | 55.6-57.5   | 19,132,837 | 19,133,086 |
| RM1146   | P | K | 10 | 55.6-57.5   | 19,168,982 | 19,169,205 |
| RM5841   | P | K | 10 | 55.6-57.5   | 19,202,360 | 19,202,616 |
| RM6691   | P | K | 10 | 61.4        | 19,785,088 | 19,785,371 |
| RM4477   | P | K | 10 | 71.4        | 20,655,592 | 20,655,732 |
| RM3451   | P | K | 10 | 72.8        | 21,122,835 | 21,123,072 |
| RM3123   | p | K | 10 | 73.7        | 21,316,923 | 21,317,146 |
| RM5471-1 | p | K | 10 | 73.7-83.0   | 21,403,092 | 21,403,331 |
| RM5768   | p | K | 10 | 73.7-83.0   | 22,081,651 | 22,081,877 |

|          |   |   |    |             |            |            |
|----------|---|---|----|-------------|------------|------------|
| RM6614   | p | K | 10 | 73.7-83.0   | 22,302,371 | 22,302,597 |
| RM6673   | P | K | 10 | 83.8        | 22,561,827 | 22,562,056 |
| RM4771   | P | K | 10 | 83.8        | 22,564,979 | 22,565,230 |
| RM7453   | P | K | 11 | 2.8-4.1     | 933,199    | 933,438    |
| RM7203   | P | K | 11 | 4.1         | 1,083,833  | 1,084,064  |
| RM3717   | P | K | 11 | 4.8         | 1,174,057  | 1,174,282  |
| RM3668   | P | - | 11 | 6.5         | 1,463,300  | 1,463,527  |
| RM2459   | P | K | 11 | 10.3        | 2,391,067  | 2,391,196  |
| RM1812   | P | K | 11 | 10.3        | 2,391,986  | 2,392,217  |
| RM5599-1 | P | K | 11 | 19.8        | 3,808,835  | 3,809,067  |
| RM6544   | p | K | 11 | 19.85       | 3,838,097  | 3,838,323  |
| RM3339   | P | K | 11 | 20.3        | 4,120,670  | 4,120,899  |
| RM5704-1 | P | K | 11 | 28.6        | 5,403,551  | 5,403,810  |
| RM3133   | P | K | 11 | 32.1-33.4   | 6,109,417  | 6,109,644  |
| RM3137   | P | K | 11 | 32.1-33.4   | 6,110,975  | 6,111,204  |
| RM4469   | P | K | 11 | 32.1-33.4   | 6,181,989  | 6,182,128  |
| RM7248   | P | K | 11 | 45.3        | 7,930,320  | 7,930,543  |
| RM3701   | P | K | 11 | 45.3        | 8,024,626  | 8,024,855  |
| RM7283   | P | K | 11 | 49.6        | 9,024,117  | 9,024,368  |
| RM3185   | P | K | 11 | 49.6-52.9   | 9,128,505  | 9,128,728  |
| RM1206   | P | K | 11 | 52.9-54.3   | 9,668,428  | 9,668,655  |
| RM4862   | P | K | 11 | 54.3        | 9,884,869  | 9,885,124  |
| RM7463   | P | K | 11 | 54.8-55.1   | 10,095,186 | 10,095,425 |
| RM7120   | P | K | 11 | 55.9-56.2   | 11,684,902 | 11,685,125 |
| RM5857   | P | K | 11 | 55.9-56.2   | 11,759,816 | 11,760,108 |
| RM6091   | p | K | 11 | 56.2        | 13,290,044 | 13,290,276 |
| RM3428   | P | K | 11 | 56.2        | 13,366,516 | 13,366,751 |
| RM5824   | P | K | 11 | 56.2-57.3   | 13,950,019 | 13,950,254 |
| RM6272   | P | K | 11 | 64.2        | 16,400,544 | 16,400,773 |
| RM4746   | P | K | 11 | 64.2        | 16,455,330 | 16,455,565 |
| RM1341   | P | K | 11 | 80.2-80.5   | 19,438,976 | 19,439,219 |
| RM6422   | p | K | 11 | 80.2-80.5   | 19,483,244 | 19,483,464 |
| RM6534   | P | K | 11 | 84.6-85.7   | 20,662,189 | 20,662,415 |
| RM4601   | P | K | 11 | 90.1        | 22,251,890 | 22,252,012 |
| RM6499   | P | K | 11 | 91.4-97.3   | 23,227,875 | 23,228,098 |
| RM4112   | P | K | 11 | 101.9       | 24,257,229 | 24,257,456 |
| RM2191-1 | P | K | 11 | 101.9       | 24,271,958 | 24,272,201 |
| RM1233-1 | P | K | 11 | 112.9       | 26,137,367 | 26,137,596 |
| RM2064   | P | K | 11 | 114.4-115.1 | 26,612,971 | 26,613,111 |
| RM2136   | P | K | 11 | 117.9       | 28,302,443 | 28,302,680 |
| RM7443   | P | - | 11 | 117.9       | 28,322,869 | 28,323,096 |
| RM5568   | P | K | 12 | 9.4-9.7     | 711,799    | 712,034    |
| RM1880   | P | K | 12 | 9.4-9.7     | 746,907    | 747,142    |
| RM1080   | P | K | 12 | 9.7         | 905,086    | 905,331    |
| RM3323   | P | K | 12 | 9.7         | 975,922    | 976,149    |
| RM1208   | P | K | 12 | 9.7         | 1,074,283  | 1,074,510  |
| RM7315   | P | K | 12 | 12.2-26.0   | 2,181,945  | 2,182,180  |
| RM3747   | P | K | 12 | 12.2-26.0   | 2,304,382  | 2,304,615  |
| RM6998   | P | K | 12 | 30.0-38.1   | 4,745,116  | 4,745,351  |
| RM7619   | P | K | 12 | 38.1        | 4,828,787  | 4,829,038  |
| RM5746   | p | K | 12 | 39.4        | 5,091,932  | 5,092,155  |
| RM7119   | P | K | 12 | 41.2        | 6,694,643  | 6,694,866  |
| RM2935   | P | K | 12 | 47          | 7,424,904  | 7,425,181  |
| RM2529   | P | K | 12 | 47.6        | 7,566,687  | 7,566,944  |
| RM1036   | P | K | 12 | 48.2        | 8,796,058  | 8,796,285  |
| RM7195   | P | K | 12 | 49.3        | 9,895,547  | 9,895,774  |
| RM6973-1 | P | K | 12 | 49.3        | 10,080,086 | 10,080,324 |
| RM5364   | P | K | 12 | 51.5        | 12,025,668 | 12,025,893 |
| RM7344   | p | K | 12 | 62.2        | 17,990,727 | 17,990,950 |
| RM1246-1 | P | K | 12 | 65.3        | 19,156,050 | 19,156,279 |
| RM5700-1 | P | K | 12 | 73.3-75.8   | 22,016,809 | 22,017,068 |
| RM6869   | P | K | 12 | 75.8        | 22,286,778 | 22,287,001 |
| RM1015   | P | K | 12 | 75.8-78.9   | 22,473,762 | 22,473,987 |
| RM3813   | P | K | 12 | 86.5-88.6   | 23,313,519 | 23,313,760 |
| RM7376   | P | K | 12 | 88.6-91.4   | 23,510,599 | 23,510,822 |
| RM3331   | P | K | 12 | 88.6-91.4   | 23,527,988 | 23,528,217 |
| RM1103   | P | K | 12 | 91.4        | 23,606,675 | 23,606,898 |
| RM6693   | p | K | 12 | 91.9        | 23,832,690 | 23,832,979 |
| RM6947   | p | K | 12 | 91.9-94.6   | 24,041,241 | 24,041,464 |
| RM5479-1 | P | K | 12 | 95.1-95.4   | 24,446,105 | 24,446,346 |
| RM5715-1 | P | K | 12 | 97          | 25,067,657 | 25,067,940 |
| RM7025   | p | K | 12 | 100.9-103.1 | 25,923,135 | 25,923,358 |
| RM1194   | P | K | 12 | 100.9-103.1 | 25,931,697 | 25,931,924 |
| RM1310   | P | K | 12 | 100.9-103.1 | 25,940,358 | 25,940,595 |
| RM1300   | P | K | 12 | 100.9-103.1 | 26,032,495 | 26,032,730 |
| RM6189   | p | K | 12 | 100.9-103.1 | 26,055,257 | 26,055,480 |
| RM1999   | P | K | 12 | 103.1       | 26,182,327 | 26,182,565 |
| RM2734   | P | K | 12 | 103.1       | 26,220,916 | 26,221,181 |
| RM1226   | P | K | 12 | 109.2       | 27,380,115 | 27,380,344 |
| RM2197   | P | K | 12 | 109.2       | 27,420,384 | 27,420,629 |

\*RAP Build3
