# Supplementary material for: Natural Variation of the RICE FLOWERING LOCUS T 1 Contributes to Flowering Time Divergence in Rice
Source: PubMed Central journal article supplement (PMC3788028; doi:10.1371/journal.pone.0075959), 2013-10-01
Supplement: pone.0075959.s013.pdf [file pone.0075959.s013.pdf]

**Table S2: Information for 24 cultivars, the flowering time and the expression levels of *RFT1* and *Hd3a* under SD, LD and ND conditions.**

| Name of accessions | Category | SD           |               |                 | LD           |               |                 | ND           |               |                 |
|--------------------|----------|--------------|---------------|-----------------|--------------|---------------|-----------------|--------------|---------------|-----------------|
|                    |          | * <i>RFT</i> | * <i>Hd3a</i> | Days to heading | * <i>RFT</i> | * <i>Hd3a</i> | Days to heading | * <i>RFT</i> | * <i>Hd3a</i> | Days to heading |
| Miryang23          | indica   | 2.4E-04      | 5.8E-04       | 64              | 4.7E-05      | 1.76E-06      | 98              | 9.7E-05      | 3.0E-04       | 107             |
| IR24               | indica   | 1.0E-05      | 1.5E-04       | 86              | 1.0E-04      | 2.84E-06      | 103             | 1.2E-04      | 5.3E-06       | 116             |
| DV85               | indica   | 2.3E-06      | 4.8E-04       | 78              | 1.1E-05      | 1.06E-06      | 87              | 5.9E-04      | 4.3E-06       | 97              |
| ARC10313           | indica   | 1.9E-06      | 5.1E-04       | 68              | 2.2E-03      | 4.26E-05      | 68              | 6.1E-03      | 8.5E-04       | 85              |
| Bhadua             | indica   | 7.4E-06      | 3.4E-03       | 51              | 4.2E-06      | 2.66E-06      | 146             | 1.0E-05      | 2.2E-06       | 136             |
| Taichung65         | indica   | 8.5E-05      | 1.5E-04       | 94              | 9.1E-06      | 3.29E-06      | 119             | 2.6E-04      | 5.6E-06       | 107             |
| Nona Bokra         | indica   | 1.1E-03      | 4.3E-03       | 50              | 4.4E-06      | 2.1E-06       | 160             | 3.6E-06      | 9.5E-07       | 209             |
| Kasalath           | indica   | 1.1E-06      | 2.3E-04       | 80              | 9.8E-05      | 3.45E-06      | 88              | 3.9E-04      | 3.5E-06       | 101             |
| Kamenoo            | japonica | 2.1E-04      | 2.2E-03       | 50              | 1.5E-05      | 1.6E-06       | 107             | 1.9E-04      | 2.3E-06       | 114             |
| Kameji             | japonica | 2.4E-04      | 5.4E-03       | 50              | 9.7E-06      | 2.47E-06      | 133             | 9.6E-05      | 1.2E-06       | 122             |
| Takenari           | japonica | 4.4E-04      | 9.1E-03       | 48              | 1.4E-05      | 1.2E-06       | 157             | 9.5E-05      | 2.2E-06       | 119             |
| Jinriki            | japonica | 7.7E-05      | 1.3E-03       | 53              | 4.4E-06      | 1.5E-06       | 169             | 3.4E-05      | 7.3E-07       | 126             |
| Ooba               | japonica | 7.6E-05      | 6.2E-04       | 53              | 1.0E-04      | 5.63E-06      | 94              | 9.3E-04      | 2.4E-05       | 100             |
| Asahi              | japonica | 1.1E-04      | 6.2E-03       | 52              | 6.2E-06      | 1.65E-06      | 160             | 2.4E-05      | 2.9E-07       | 123             |
| Ginbozu            | japonica | 7.5E-05      | 4.0E-04       | 55              | 3.3E-05      | 3.51E-06      | 112             | 9.5E-05      | 6.8E-07       | 122             |
| Asominori          | japonica | 4.5E-04      | 6.5E-03       | 50              | 1.1E-05      | 2.26E-06      | 118             | 9.1E-05      | 1.3E-06       | 115             |
| Nipponbare         | japonica | 8.9E-04      | 8.3E-03       | 48              | 1.3E-05      | 1.52E-06      | 116             | 2.2E-04      | 1.7E-05       | 114             |
| Koshihikari        | japonica | 2.0E-04      | 1.3E-03       | 53              | 4.1E-03      | 0.000954      | 76              | 6.6E-04      | 3.4E-05       | 99              |
| Sasanishiki        | japonica | 2.1E-05      | 3.6E-05       | 60              | 4.6E-04      | 1.42E-05      | 81              | 1.8E-03      | 2.8E-05       | 95              |
| Dontokoi           | japonica | 6.9E-05      | 2.3E-04       | 59              | 9.6E-04      | 6.62E-05      | 80              | 3.8E-04      | 2.1E-05       | 104             |
| Akiahikari         | japonica | 9.8E-05      | 6.0E-04       | 57              | 3.1E-03      | 0.000138      | 70              | 4.7E-03      | 4.4E-04       | 89              |
| Habataki           | japonica | 1.8E-04      | 3.1E-04       | 62              | 1.4E-03      | 9.28E-06      | 79              | 7.2E-04      | 2.9E-05       | 99              |
| Hayamasari         | japonica | 1.3E-04      | 8.3E-04       | 54              | 4.3E-03      | 0.018787      | 53              | 9.3E-03      | 1.6E-02       | 62              |
| Hoshinoyume        | japonica | 4.5E-04      | 3.8E-03       | 51              | 4.8E-03      | 0.008008      | 58              | 4.5E-03      | 8.9E-03       | 75              |

\*Relative expression levels
