# Supplementary material for: Natural Variation of the RICE FLOWERING LOCUS T 1 Contributes to Flowering Time Divergence in Rice
Source: PubMed Central journal article supplement (PMC3788028; doi:10.1371/journal.pone.0075959), 2013-10-01
Supplement: pone.0075959.s014.pdf [file pone.0075959.s014.pdf]

|     |     |            |    |   |     |    |    |       |              |             |                     |
|-----|-----|------------|----|---|-----|----|----|-------|--------------|-------------|---------------------|
| 19  | 86  | IRGC012883 | 1  | 5 | 4   | 2  | 2  | I     | Japonica     | Iran        | Mehr                |
| 20  | 87  | IRGC017757 | 1  | 5 | 4   | 2  | 2  | I     | Japonica     | Indonesia   | Jambu               |
| 21  | 88  | IRGC024224 | 2  | 2 | II  | 5  | 3  | VI    | Indica       | Thailand    | Khao Gaew           |
| 22  | 89  | IRGC026514 |    |   |     | 1  | 3  | XIV   | Indica       | Bangladesh  | Nara Aswina         |
| 23  | 90  | IRGC027513 | 3  | 3 | III | 3  | 1  | III   | Japonica     | Bangladesh  | Dholi Boro          |
| 24  | 91  | IRGC027588 |    |   |     |    | 2  |       | Indica       | Bangladesh  | Rayada              |
| 25  | 92  | IRGC027748 | 2  | 2 | II  | 1  | 1  | II    | Indica       | Thailand    | Khao Dawk Mail 105  |
| 26  | 93  | IRGC030238 | 2  | 2 | II  | 1  | 1  | II    | Indica       | Thailand    | Champa Tong 54      |
| 27  | 94  | IRGC030416 | 2  | 2 | II  |    | 1  |       | Indica       | Philippines | IR36                |
| 28  | 95  | IRGC031696 | 3  | 3 | III | 3  | 1  | III   | Indica       | Bangladesh  | Aswina              |
| 29  | 96  | IRGC032362 | 4  | 4 | IV  | 4  | 1  | IV    | Japonica     | Iran        | Tchampa             |
| 30  | 97  | IRGC032399 | 1  | 1 | I   |    | 2  | 5     | Indica       | Bhutan      | Phudugey            |
| 31  | 98  | IRGC038994 | 1  | 1 | I   | 2  | 2  | I     | Japonica     | Brazil      | Bico Branco         |
| 32  | 99  | IRGC042469 | 1  | 5 | 4   | 2  | 2  | I     | Japonica     | India       | ARC 13829           |
| 33  | 100 | IRGC043369 | 2  | 2 | II  | 1  |    | II    | Indica       | Indonesia   | Cere Air            |
| 34  | 101 | IRGC043400 | 2  | 2 | II  | 1  |    | II    | Indica       | Indonesia   | Ilis Air            |
| 35  | 102 | IRGC043675 | 10 | 1 | 6   | 2  | 2  | I     | Japonica     | Indonesia   | Tremnese            |
| 36  | 103 | IRGC051250 | 1  | 1 | I   | 2  | 2  | I     | Indica       | China       | Ai-Chiao-Hong       |
| 37  | 104 | IRGC051300 | 2  | 4 | 13  | 1  | 1  | II    | Indica       | China       | Guan-Yin-Tsan       |
| 38  | 105 | IRGC053637 | 1  | 5 | 4   | 2  | 2  | I     | Japonica     | India       | Basmati 217         |
| 39  | 106 | IRGC056036 | 2  | 2 | II  | 1  | 1  | II    | Indica       | Vietnam     | Chau                |
| 40  | 107 | IRGC064801 | 2  | 2 | II  | 1  | 1  | II    | Indica       | Bangladesh  | BR34                |
| 41  | 108 | IRGC077210 | 3  | 3 | III | 3  | 3  | III   | Indica       | Bangladesh  | Rayada              |
| 42  | 109 | IRGC077483 | 2  | 2 | II  |    | 1  |       | Indica       | Brazil      | IRGA 409            |
| 68  | 110 | JRC001     | 1  | 1 | I   | 2  | 2  | I     | Japonica     | Japan       | GAISEN MOCHI        |
| 69  | 111 | JRC003     | 1  | 1 | I   | 2  | 2  | I     | Japonica     | Japan       | HINODE              |
| 70  | 112 | JRC004     | 10 | 1 | 6   | 2  | 2  | I     | Japonica     | Japan       | SENSHOU             |
| 71  | 113 | JRC005     | 1  | 1 | I   | 2  | 2  | I     | Japonica     | Japan       | YAMADA BAKE         |
| 72  | 114 | JRC006     | 1  | 1 | I   | 2  | 2  | I     | Japonica     | Japan       | KANEKO              |
| 73  | 115 | JRC007     | 10 | 1 | 6   | 2  | 2  | I     | Japonica     | Japan       | IRIMA NISHIKI       |
| 74  | 116 | JRC008     | 1  | 1 | I   | 2  | 2  | I     | Japonica     | Japan       | OKKA MODOSHI        |
| 75  | 117 | JRC010     | 1  | 1 | I   | 2  | 10 | I     | Japonica     | Japan       | HIRAYAMA            |
| 76  | 118 | JRC011     | 1  | 1 | I   | 2  | 2  | I     | Japonica     | Japan       | KAHEI               |
| 77  | 119 | JRC012     | 1  | 1 | I   | 2  | 2  | I     | Japonica     | Japan       | OIRAN               |
| 78  | 120 | JRC013     | 1  | 1 | I   | 2  | 2  | I     | Japonica     | Japan       | BOUZU MOCHI         |
| 79  | 121 | JRC014     | 1  | 1 | I   | 2  | 2  | I     | Japonica     | Japan       | MEGURO MOCHI        |
| 80  | 122 | JRC017     | 1  | 1 | I   | 2  |    | VII   | Japonica     | Japan       | AKAGE               |
| 81  | 123 | JRC018     | 1  | 1 | I   | 2  | 2  | I     | Japonica     | Japan       | HASSOKUHO           |
| 82  | 124 | JRC019     | 1  | 1 | I   | 2  | 4  | VIII  | Japonica     | Japan       | WATARIBUNE          |
| 83  | 125 | JRC020     | 1  | 1 | I   | 2  | 2  | I     | Japonica     | Japan       | HOSOGARA            |
| 84  | 126 | JRC021     | 2  | 2 | 8   | 1  | 1  | II    | Indica       | Japan       | AKAMAI              |
| 85  | 127 | JRC022     | 1  | 1 | I   | 2  | 2  | I     | Japonica     | Japan       | MANSAKU             |
| 86  | 128 | JRC023     | 1  | 1 | I   | 2  | 2  | I     | Japonica     | Japan       | ISHIJIRO            |
| 87  | 129 | JRC024     | 1  | 1 | I   | 2  | 2  | I     | Japonica     | Japan       | JOUSHUU             |
| 88  | 130 | JRC025     | 1  | 1 | I   | 2  | 2  | I     | Japonica     | Japan       | DANGO               |
| 89  | 131 | JRC026     | 1  | 1 | I   | 2  | 2  | I     | Japonica     | Japan       | AIKOKU              |
| 90  | 132 | JRC027     | 1  | 1 | I   | 2  | 2  | I     | Japonica     | Japan       | GINBOUZU            |
| 91  | 133 | JRC028     | 1  | 1 | I   | 2  | 4  | VIII  | Japonica     | Japan       | SHINRIKI MOCHI      |
| 92  | 134 | JRC029     | 1  | 1 | I   | 2  | 2  | I     | Japonica     | Japan       | SHICHIMENCHOU MOCHI |
| 93  | 135 | JRC030     | 1  | 1 | I   | 2  | 2  | I     | Japonica     | Japan       | MORITA WASE         |
| 94  | 136 | JRC031     | 1  | 1 | I   | 2  | 2  | I     | Japonica     | Japan       | KAMEJI              |
| 95  | 137 | JRC032     | 1  | 1 | I   | 2  | 4  | VIII  | Japonica     | Japan       | OMACHI              |
| 96  | 138 | JRC033     | 1  | 1 | I   | 2  | 4  | VIII  | Japonica     | Japan       | SHINRIKI            |
| 97  | 139 | JRC034     | 1  | 1 | I   | 2  | 2  | I     | Japonica     | Japan       | KYOUTOASAHI         |
| 98  | 140 | JRC035     | 1  | 1 | I   | 2  | 2  | I     | Japonica     | Japan       | KABASHIKO           |
| 99  | 141 | JRC036     | 1  | 1 | I   | 2  | 2  | I     | Japonica     | Japan       | SEKIYAMA            |
| 100 | 142 | JRC037     | 1  | 1 | I   | 2  | 2  | I     | Japonica     | Japan       | SHINYAMADAHO 2      |
| 101 | 143 | JRC038     | 1  | 1 | I   | 2  | 10 | VII   | Japonica     | Japan       | NAGYOYA SHIRO       |
| 102 | 144 | JRC039     | 1  | 1 | I   | 2  | 2  | I     | Japonica     | Japan       | SHIROINE(KEMOMI)    |
| 103 | 145 | JRC040     | 1  | 1 | I   | 2  | 2  | I     | Indica       | Japan       | AKAMAI              |
| 104 | 146 | JRC041     | 1  | 1 | I   | 2  | 2  | I     | Indica       | Japan       | AKAMAI              |
| 105 | 147 | JRC042     | 2  | 2 | II  | 1  | 1  | II    | Indica       | Japan       | TOUBOSHI            |
| 106 | 148 | JRC043     | 2  | 2 | II  | 1  | 1  | II    | Indica       | Japan       | AKAMAI              |
| 107 | 149 | JRC044     | 2  | 4 | 7   | 1  | 1  | II    | Indica       | Japan       | KARAHOSHU           |
| 108 | 150 | JRC045     | 1  | 1 | I   | 2  | 2  | I     | Japonica     | Japan       | HIYADACHITOU        |
| 109 | 151 | JRC046     | 1  | 1 | I   | 2  | 10 | VII   | Japonica     | Japan       | FUKOKU              |
| 110 | 152 | JRC047     | 1  | 1 | I   | 2  | 2  | I     | Japonica     | Japan       | OKABO               |
| 111 | 153 | JRC048     | 1  | 1 | I   | 2  | 2  | I     | Japonica     | Japan       | HAKAMURI(YOKOYAMA)  |
| 112 | 154 | JRC049     | 1  | 1 | I   | 2  | 2  | I     | Japonica     | Japan       | RIKUTOU RIKUU 2     |
| 113 | 155 | JRC050     | 1  | 1 | I   | 2  | 4  | VIII  | Japonica     | Japan       | HIMENOMOCHI         |
| 114 | 156 | JRC051     | 1  | 1 | I   | 2  | 2  | I     | Japonica     | Japan       | SHINSHUU            |
| 115 | 157 | JRC052     | 1  | 1 | I   | 2  | 2  | I     | Japonica     | Japan       | AICHIASAHI          |
| 116 | 158 | JRC053     | 1  | 1 | I   | 2  | 4  | VIII  | Japonica     | Japan       | RAIDEN              |
| 117 | 159 | JRC054     | 1  | 1 | I   | 4  | 2  |       | Japonica     | Japan       | HOUMANSHINDEN IN LD |
| 1   | 160 | IRGC101508 | 25 | 6 | 14  | 3  | 19 | XIX   | O. rufipogon | India       |                     |
| 2   | 161 | IRGC105908 | 26 | 8 | 15  | 11 | 7  |       | O. rufipogon | Thailand    |                     |
| 43  | 162 | IRGC082990 |    |   |     |    | 29 |       | O. rufipogon | China       |                     |
| 44  | 163 | IRGC082993 |    | 7 |     | 10 | 2  |       | O. rufipogon | China       |                     |
| 45  | 164 | IRGC101971 | 3  | 3 | III | 3  | 1  | III   | O. rufipogon | India       |                     |
| 46  | 165 | IRGC102171 | 11 | 6 | 16  | 7  | 7  | XV    | O. rufipogon | India       |                     |
| 47  | 166 | IRGC102179 | 12 | 6 | 17  | 7  | 7  | XV    | O. rufipogon | India       |                     |
| 48  | 167 | IRGC103824 | 2  | 2 | II  |    | 20 | XXIII | O. rufipogon | China       | W1723               |
| 49  | 168 | IRGC103827 | 13 | 7 | 18  |    | 11 | XII   | O. rufipogon | Bangladesh  |                     |
| 50  | 169 | IRGC104404 | 14 | 4 | 19  | 8  | 17 | XVI   | O. rufipogon | Thailand    |                     |
| 51  | 170 | IRGC104626 | 15 | 1 | 20  | 9  | 8  | XVII  | O. rufipogon | China       |                     |
| 52  | 171 | IRGC104639 |    | 4 |     |    | 21 |       | O. rufipogon | Thailand    |                     |
| 53  | 172 | IRGC104684 | 16 | 6 | 21  | 10 | 7  | XIX   | O. rufipogon | India       |                     |
| 54  | 173 | IRGC104969 | 17 | 3 | 22  | 11 | 6  | XVIII | O. rufipogon | China       |                     |
| 55  | 174 | IRGC105375 |    | 1 |     |    | 22 |       | O. rufipogon | Thailand    |                     |
| 56  | 175 | AS017      | 3  | 3 | III | 3  | 1  | III   | O. rufipogon | Bangladesh  |                     |
| 57  | 176 | AS051      |    |   |     |    |    |       | O. rufipogon | Nepal       |                     |

|     |     |       |    |    |     |    |    |       |              |             |
|-----|-----|-------|----|----|-----|----|----|-------|--------------|-------------|
| 58  | 177 | AS062 | 3  | 3  | III | 3  | 1  | III   | O. rufipogon | Laos        |
| 59  | 178 | AS065 | 27 | 6  | 23  |    |    |       | O. rufipogon | Indonesia   |
| 60  | 179 | AS068 |    |    |     |    |    | 23    | O. rufipogon | Bangladesh  |
| 61  | 180 | AS074 |    |    |     |    |    | 11    | O. rufipogon | India       |
| 62  | 181 | AS078 |    |    |     |    |    | 24    | O. rufipogon | Cambodia    |
| 63  | 182 | AS083 |    |    |     |    |    | 25    | O. rufipogon | Vietnam     |
| 64  | 183 | AS084 | 28 | 9  | 24  | 8  | 9  | XVIII | O. rufipogon | China       |
| 65  | 184 | AS088 | 29 | 1  | 25  | 13 | 16 | XVII  | O. rufipogon | China       |
| 66  | 185 | AS089 | 30 | 3  | 26  | 15 | 6  | XXII  | O. rufipogon | Indonesia   |
| 67  | 186 | AS092 | 31 | 10 | 27  | 9  | 18 |       | O. rufipogon | Vietnam     |
| 120 | 187 | W0106 | 36 | 8  | 26  | 12 | 27 | XX    | O. rufipogon | India       |
| 121 | 188 | W0120 |    |    |     | 13 | 12 | XXI   | O. rufipogon | India       |
| 122 | 189 | W0157 | 32 | 1  | 27  | 9  | 9  | XVIII | O. rufipogon | India       |
| 119 | 190 | W0574 |    |    |     |    |    | 1     | O. rufipogon |             |
| 123 | 191 | W0593 | 18 | 12 | 28  |    |    |       | O. rufipogon | Malaysia    |
| 124 | 192 | W0630 |    |    |     |    |    | 3     | O. rufipogon | Myanmar     |
| 125 | 193 | W1294 |    |    |     | 12 | 28 |       | O. rufipogon | Philippines |
| 126 | 194 | W1666 | 33 | 11 | 29  | 14 | 12 | XXII  | O. rufipogon | India       |
| 127 | 195 | W1715 | 19 | 13 | 30  |    |    |       | O. rufipogon | China       |
| 128 | 196 | W1807 | 20 | 3  | 31  | 15 | 13 | XXIII | O. rufipogon | Sri Lanka   |
| 129 | 197 | W1865 | 34 | 3  | 32  | 15 | 13 | XXIII | O. rufipogon | Thailand    |
| 130 | 198 | W1943 | 37 | 1  | 33  | 16 | 8  | XXIV  | O. rufipogon | China       |
| 131 | 199 | W1944 | 21 | 1  | 34  | 16 | 8  | XXV   | O. rufipogon | China       |
| 132 | 200 | W1981 | 22 | 6  | 35  |    |    |       | O. rufipogon | Indonesia   |
| 133 | 201 | W2003 | 23 | 6  | 36  |    |    |       | O. rufipogon | India       |
| 134 | 202 | W2014 | 35 | 1  | 37  | 16 | 8  | XXVI  | O. rufipogon | India       |
| 135 | 203 | W2263 |    |    |     |    |    | 9     | O. rufipogon | Cambodia    |
| 136 | 204 | W2265 | 24 | 10 | 38  |    | 26 | XXI   | O. rufipogon | Laos        |
