# Supplementary material for: Natural Variation of the RICE FLOWERING LOCUS T 1 Contributes to Flowering Time Divergence in Rice
Source: PubMed Central journal article supplement (PMC3788028; doi:10.1371/journal.pone.0075959), 2013-10-01
Supplement: pone.0075959.s015.pdf [file pone.0075959.s015.pdf]

**Table S4: Tajima's Relative Rate Test for *Hd3a* and *RFT1* with *BradHd3a* (*Brachypodium distachyon*) DNA sequences**

| Accession        | Outgroup | Identical sites | Unique sites | Unique Sites |             |          | $\chi^2$ | dN/dS       |             |
|------------------|----------|-----------------|--------------|--------------|-------------|----------|----------|-------------|-------------|
|                  |          |                 |              | <i>Hd3a</i>  | <i>RFT1</i> | Outgroup |          | <i>Hd3a</i> | <i>RFT1</i> |
| 101508           | Bradi    | 439             | 14           | 18           | 22          | 41       | 0.4000   | 0.1422      | 0.1508      |
| 105908           | Bradi    | 441             | 11           | 17           | 18          | 47       | 0.0286   | 0.1561      | 0.1471      |
| A001             | Bradi    | 444             | 11           | 14           | 17          | 48       | 0.2903   | 0.1478      | 0.1471      |
| A002             | Bradi    | 443             | 13           | 16           | 19          | 43       | 0.2571   | 0.1305      | 0.1473      |
| A006             | Bradi    | 444             | 11           | 14           | 17          | 48       | 0.2903   | 0.1478      | 0.1471      |
| A008             | Bradi    | 444             | 11           | 14           | 17          | 48       | 0.2903   | 0.1478      | 0.1470      |
| A011             | Bradi    | 444             | 11           | 14           | 17          | 48       | 0.2903   | 0.1478      | 0.1471      |
| A014             | Bradi    | 445             | 11           | 14           | 16          | 48       | 0.1333   | 0.1478      | 0.1405      |
| A015             | Bradi    | 444             | 11           | 14           | 17          | 48       | 0.2903   | 0.1478      | 0.1471      |
| A016             | Bradi    | 444             | 11           | 14           | 17          | 48       | 0.2903   | 0.1478      | 0.1471      |
| A018             | Bradi    | 443             | 13           | 16           | 19          | 43       | 0.2571   | 0.1305      | 0.1473      |
| A019             | Bradi    | 443             | 13           | 16           | 19          | 43       | 0.2571   | 0.1305      | 0.1473      |
| A020             | Bradi    | 444             | 11           | 14           | 17          | 48       | 0.2903   | 0.1478      | 0.1470      |
| A021             | Bradi    | 444             | 11           | 14           | 17          | 48       | 0.2903   | 0.1478      | 0.1471      |
| A022             | Bradi    | 444             | 11           | 14           | 17          | 48       | 0.2903   | 0.1478      | 0.1471      |
| A024             | Bradi    | 444             | 11           | 14           | 17          | 48       | 0.2903   | 0.1478      | 0.1471      |
| A025             | Bradi    | 442             | 13           | 16           | 20          | 43       | 0.4444   | 0.1305      | 0.1540      |
| A027             | Bradi    | 442             | 13           | 16           | 20          | 43       | 0.4444   | 0.1305      | 0.1540      |
| A028             | Bradi    | 446             | 11           | 12           | 17          | 48       | 0.8621   | 0.1341      | 0.1471      |
| A030             | Bradi    | 446             | 11           | 12           | 17          | 48       | 0.8621   | 0.1341      | 0.1471      |
| A032             | Bradi    | 444             | 11           | 14           | 17          | 48       | 0.2903   | 0.1478      | 0.1470      |
| A035             | Bradi    | 444             | 11           | 14           | 17          | 48       | 0.2903   | 0.1478      | 0.1471      |
| A036             | Bradi    | 444             | 11           | 14           | 17          | 48       | 0.2903   | 0.1478      | 0.1471      |
| A037             | Bradi    | 444             | 11           | 14           | 17          | 48       | 0.2903   | 0.1478      | 0.1471      |
| A039             | Bradi    | 444             | 11           | 14           | 17          | 48       | 0.2903   | 0.1478      | 0.1470      |
| A040             | Bradi    | 445             | 11           | 14           | 16          | 48       | 0.1333   | 0.1478      | 0.1405      |
| A041             | Bradi    | 442             | 13           | 17           | 19          | 43       | 0.1111   | 0.1373      | 0.1473      |
| A045             | Bradi    | 443             | 13           | 16           | 19          | 43       | 0.2571   | 0.1305      | 0.1473      |
| A047             | Bradi    | 442             | 13           | 16           | 20          | 43       | 0.4444   | 0.1305      | 0.1540      |
| A048             | Bradi    | 444             | 11           | 14           | 17          | 48       | 0.2903   | 0.1478      | 0.1471      |
| A049             | Bradi    | 444             | 11           | 14           | 17          | 48       | 0.2903   | 0.1478      | 0.1471      |
| A050             | Bradi    | 443             | 13           | 16           | 19          | 43       | 0.2571   | 0.1305      | 0.1473      |
| A053             | Bradi    | 443             | 13           | 16           | 19          | 43       | 0.2571   | 0.1305      | 0.1473      |
| A054             | Bradi    | 445             | 11           | 14           | 16          | 48       | 0.1333   | 0.1478      | 0.1405      |
| A055             | Bradi    | 442             | 13           | 16           | 20          | 43       | 0.4444   | 0.1305      | 0.1540      |
| A056             | Bradi    | 444             | 11           | 14           | 17          | 48       | 0.2903   | 0.1478      | 0.1471      |
| A059             | Bradi    | 444             | 11           | 14           | 17          | 48       | 0.2903   | 0.1478      | 0.1471      |
| A063             | Bradi    | 446             | 11           | 12           | 17          | 48       | 0.8621   | 0.1341      | 0.1470      |
| A064             | Bradi    | 444             | 11           | 14           | 17          | 48       | 0.2903   | 0.1478      | 0.1471      |
| A074             | Bradi    | 443             | 13           | 16           | 19          | 43       | 0.2571   | 0.1305      | 0.1473      |
| A082             | Bradi    | 444             | 11           | 14           | 17          | 48       | 0.2903   | 0.1478      | 0.1470      |
| A086             | Bradi    | 439             | 14           | 18           | 22          | 41       | 0.4000   | 0.1422      | 0.1508      |
| A087             | Bradi    | 439             | 14           | 18           | 22          | 41       | 0.4000   | 0.1422      | 0.1508      |
| A091             | Bradi    | 445             | 10           | 13           | 17          | 49       | 0.5333   | 0.1408      | 0.1471      |
| A092             | Bradi    | 441             | 11           | 17           | 18          | 47       | 0.0286   | 0.1559      | 0.1471      |
| A096             | Bradi    | 442             | 10           | 17           | 17          | 48       | 0.0000   | 0.1561      | 0.1405      |
| A100             | Bradi    | 439             | 13           | 20           | 20          | 42       | 0.0000   | 0.1451      | 0.1473      |
| A103             | Bradi    | 441             | 10           | 18           | 17          | 48       | 0.0286   | 0.1628      | 0.1405      |
| A107             | Bradi    | 439             | 14           | 18           | 22          | 41       | 0.4000   | 0.1422      | 0.1508      |
| A112             | Bradi    | 444             | 11           | 14           | 16          | 49       | 0.1333   | 0.1438      | 0.1470      |
| A114             | Bradi    | 441             | 14           | 17           | 19          | 43       | 0.1111   | 0.1438      | 0.1473      |
| AS017            | Bradi    | 444             | 11           | 14           | 17          | 48       | 0.2903   | 0.1478      | 0.1470      |
| AS062            | Bradi    | 444             | 11           | 14           | 17          | 48       | 0.2903   | 0.1478      | 0.1470      |
| AS083            | Bradi    | 443             | 11           | 16           | 17          | 47       | 0.0303   | 0.1490      | 0.1303      |
| AS084            | Bradi    | 441             | 11           | 16           | 17          | 49       | 0.0303   | 0.1628      | 0.1535      |
| AS088            | Bradi    | 439             | 13           | 20           | 20          | 42       | 0.0000   | 0.1559      | 0.1473      |
| AS089            | Bradi    | 444             | 11           | 14           | 16          | 49       | 0.1333   | 0.1438      | 0.1470      |
| AS092            | Bradi    | 440             | 11           | 19           | 17          | 47       | 0.1111   | 0.1584      | 0.1405      |
| JRC012           | Bradi    | 443             | 13           | 16           | 19          | 43       | 0.2571   | 0.1305      | 0.1473      |
| JRC021           | Bradi    | 444             | 11           | 14           | 17          | 48       | 0.2903   | 0.1478      | 0.1471      |
| JRC022           | Bradi    | 443             | 13           | 16           | 19          | 43       | 0.2571   | 0.1305      | 0.1473      |
| JRC027           | Bradi    | 443             | 13           | 16           | 19          | 43       | 0.2571   | 0.1305      | 0.1473      |
| JRC033           | Bradi    | 442             | 13           | 17           | 19          | 43       | 0.1111   | 0.1270      | 0.1473      |
| JRC034           | Bradi    | 443             | 13           | 16           | 19          | 43       | 0.2571   | 0.1305      | 0.1473      |
| JRC042           | Bradi    | 444             | 11           | 14           | 17          | 48       | 0.2903   | 0.1478      | 0.1471      |
| JRC047           | Bradi    | 443             | 13           | 16           | 19          | 43       | 0.2571   | 0.1305      | 0.1473      |
| NonaBokra        | Bradi    | 444             | 11           | 14           | 17          | 48       | 0.2903   | 0.1478      | 0.1471      |
| O_brachyantha    | Bradi    | 433             | 12           | 18           | 21          | 50       | 0.2308   | 0.1473      | 0.1610      |
| O_longistaminata | Bradi    | 439             | 12           | 19           | 22          | 42       | 0.2195   | 0.1524      | 0.1442      |
| O_meridionalis   | Bradi    | 438             | 9            | 18           | 23          | 46       | 0.6098   | 0.1422      | 0.1615      |
| O_punctata       | Bradi    | 434             | 8            | 18           | 25          | 49       | 1.1395   | 0.1248      | 0.1188      |
| W0106            | Bradi    | 443             | 11           | 15           | 17          | 48       | 0.1250   | 0.1542      | 0.1471      |

|        |       |     |    |    |    |    |        |        |        |
|--------|-------|-----|----|----|----|----|--------|--------|--------|
| W0157  | Bradi | 438 | 13 | 21 | 20 | 42 | 0.0244 | 0.1628 | 0.1473 |
| W1294  | Bradi | 437 | 13 | 19 | 23 | 42 | 0.3810 | 0.1384 | 0.1787 |
| W1666  | Bradi | 441 | 12 | 17 | 18 | 46 | 0.0286 | 0.1561 | 0.1471 |
| W1807  | Bradi | 443 | 11 | 15 | 18 | 47 | 0.2727 | 0.1422 | 0.1470 |
| W1865  | Bradi | 443 | 11 | 15 | 18 | 47 | 0.2727 | 0.1422 | 0.1470 |
| W1943  | Bradi | 439 | 13 | 20 | 20 | 42 | 0.0000 | 0.1451 | 0.1473 |
| W1944  | Bradi | 439 | 13 | 20 | 20 | 42 | 0.0000 | 0.1451 | 0.1473 |
| W2014  | Bradi | 439 | 13 | 20 | 20 | 42 | 0.0000 | 0.1451 | 0.1473 |
| W2265  | Bradi | 442 | 11 | 17 | 17 | 47 | 0.0000 | 0.1561 | 0.1405 |
| WRC001 | Bradi | 443 | 13 | 16 | 19 | 43 | 0.2571 | 0.1305 | 0.1473 |
| WRC002 | Bradi | 445 | 11 | 14 | 16 | 48 | 0.1333 | 0.1478 | 0.1405 |
| WRC003 | Bradi | 446 | 11 | 12 | 17 | 48 | 0.8621 | 0.1341 | 0.1471 |
| WRC004 | Bradi | 444 | 11 | 14 | 17 | 48 | 0.2903 | 0.1478 | 0.1470 |
| WRC005 | Bradi | 445 | 11 | 14 | 16 | 48 | 0.1333 | 0.1478 | 0.1405 |
| WRC006 | Bradi | 445 | 11 | 14 | 16 | 48 | 0.1333 | 0.1478 | 0.1405 |
| WRC007 | Bradi | 444 | 11 | 14 | 17 | 48 | 0.2903 | 0.1478 | 0.1471 |
| WRC009 | Bradi | 443 | 13 | 16 | 20 | 42 | 0.4444 | 0.1288 | 0.1473 |
| WRC010 | Bradi | 443 | 13 | 16 | 19 | 43 | 0.2571 | 0.1305 | 0.1473 |
| WRC011 | Bradi | 445 | 11 | 14 | 16 | 48 | 0.1333 | 0.1478 | 0.1405 |
| WRC013 | Bradi | 444 | 11 | 14 | 17 | 48 | 0.2903 | 0.1478 | 0.1471 |
| WRC014 | Bradi | 443 | 13 | 16 | 19 | 43 | 0.2571 | 0.1305 | 0.1473 |
| WRC015 | Bradi | 445 | 11 | 14 | 16 | 48 | 0.1333 | 0.1478 | 0.1405 |
| WRC016 | Bradi | 444 | 11 | 14 | 17 | 48 | 0.2903 | 0.1478 | 0.1471 |
| WRC017 | Bradi | 444 | 11 | 14 | 17 | 48 | 0.2903 | 0.1478 | 0.1471 |
| WRC019 | Bradi | 445 | 11 | 14 | 16 | 48 | 0.1333 | 0.1478 | 0.1405 |
| WRC020 | Bradi | 444 | 11 | 14 | 17 | 48 | 0.2903 | 0.1478 | 0.1471 |
| WRC021 | Bradi | 442 | 13 | 17 | 19 | 43 | 0.1111 | 0.1270 | 0.1473 |
| WRC022 | Bradi | 443 | 13 | 16 | 19 | 43 | 0.2571 | 0.1305 | 0.1473 |
| WRC023 | Bradi | 443 | 13 | 16 | 19 | 43 | 0.2571 | 0.1305 | 0.1473 |
| WRC024 | Bradi | 443 | 13 | 16 | 19 | 43 | 0.2571 | 0.1305 | 0.1473 |
| WRC025 | Bradi | 445 | 11 | 14 | 16 | 48 | 0.1333 | 0.1478 | 0.1405 |
| WRC026 | Bradi | 445 | 11 | 14 | 16 | 48 | 0.1333 | 0.1478 | 0.1405 |
| WRC027 | Bradi | 444 | 11 | 14 | 17 | 48 | 0.2903 | 0.1478 | 0.1470 |
| WRC028 | Bradi | 444 | 11 | 14 | 17 | 48 | 0.2903 | 0.1478 | 0.1470 |
| WRC029 | Bradi | 445 | 11 | 14 | 16 | 48 | 0.1333 | 0.1478 | 0.1405 |
| WRC030 | Bradi | 444 | 11 | 14 | 17 | 48 | 0.2903 | 0.1478 | 0.1470 |
| WRC031 | Bradi | 445 | 11 | 14 | 16 | 48 | 0.1333 | 0.1478 | 0.1405 |
| WRC033 | Bradi | 445 | 11 | 14 | 16 | 48 | 0.1333 | 0.1478 | 0.1405 |
| WRC034 | Bradi | 445 | 11 | 14 | 16 | 48 | 0.1333 | 0.1478 | 0.1405 |
| WRC035 | Bradi | 445 | 11 | 14 | 16 | 48 | 0.1333 | 0.1478 | 0.1405 |
| WRC036 | Bradi | 444 | 11 | 14 | 17 | 48 | 0.2903 | 0.1478 | 0.1470 |
| WRC037 | Bradi | 445 | 11 | 14 | 16 | 48 | 0.1333 | 0.1478 | 0.1405 |
| WRC038 | Bradi | 445 | 11 | 14 | 16 | 48 | 0.1333 | 0.1478 | 0.1405 |
| WRC039 | Bradi | 444 | 11 | 14 | 17 | 48 | 0.2903 | 0.1478 | 0.1470 |
| WRC040 | Bradi | 444 | 11 | 14 | 17 | 48 | 0.2903 | 0.1478 | 0.1470 |
| WRC042 | Bradi | 443 | 13 | 16 | 19 | 43 | 0.2571 | 0.1305 | 0.1473 |
| WRC043 | Bradi | 443 | 13 | 16 | 19 | 43 | 0.2571 | 0.1305 | 0.1473 |
| WRC044 | Bradi | 443 | 13 | 16 | 19 | 43 | 0.2571 | 0.1305 | 0.1473 |
| WRC046 | Bradi | 442 | 13 | 16 | 20 | 43 | 0.4444 | 0.1305 | 0.1540 |
| WRC047 | Bradi | 443 | 13 | 16 | 19 | 43 | 0.2571 | 0.1305 | 0.1473 |
| WRC048 | Bradi | 442 | 13 | 16 | 20 | 43 | 0.4444 | 0.1305 | 0.1540 |
| WRC049 | Bradi | 443 | 13 | 15 | 19 | 44 | 0.4706 | 0.1305 | 0.1540 |
| WRC050 | Bradi | 445 | 11 | 14 | 16 | 48 | 0.1333 | 0.1478 | 0.1405 |
| WRC051 | Bradi | 443 | 13 | 16 | 19 | 43 | 0.2571 | 0.1305 | 0.1473 |
| WRC053 | Bradi | 442 | 13 | 17 | 19 | 43 | 0.1111 | 0.1373 | 0.1473 |
| WRC055 | Bradi | 442 | 13 | 17 | 19 | 43 | 0.1111 | 0.1373 | 0.1473 |
| WRC057 | Bradi | 442 | 13 | 17 | 19 | 43 | 0.1111 | 0.1270 | 0.1473 |
| WRC058 | Bradi | 446 | 11 | 12 | 17 | 48 | 0.8621 | 0.1341 | 0.1471 |
| WRC059 | Bradi | 444 | 11 | 14 | 17 | 48 | 0.2903 | 0.1478 | 0.1471 |
| WRC060 | Bradi | 444 | 11 | 14 | 17 | 48 | 0.2903 | 0.1478 | 0.1471 |
| WRC061 | Bradi | 445 | 11 | 14 | 16 | 48 | 0.1333 | 0.1478 | 0.1405 |
| WRC062 | Bradi | 444 | 11 | 14 | 17 | 48 | 0.2903 | 0.1478 | 0.1471 |
| WRC064 | Bradi | 445 | 11 | 13 | 17 | 48 | 0.5333 | 0.1305 | 0.1471 |
| WRC065 | Bradi | 444 | 11 | 14 | 17 | 48 | 0.2903 | 0.1478 | 0.1471 |
| WRC066 | Bradi | 445 | 11 | 14 | 16 | 48 | 0.1333 | 0.1478 | 0.1405 |
| WRC067 | Bradi | 443 | 13 | 16 | 19 | 43 | 0.2571 | 0.1305 | 0.1473 |
| WRC068 | Bradi | 443 | 13 | 16 | 19 | 43 | 0.2571 | 0.1305 | 0.1473 |
| WRC096 | Bradi | 444 | 11 | 14 | 17 | 48 | 0.2903 | 0.1478 | 0.1471 |
| WRC097 | Bradi | 442 | 13 | 16 | 20 | 43 | 0.4444 | 0.1305 | 0.1540 |
| WRC098 | Bradi | 444 | 11 | 14 | 17 | 48 | 0.2903 | 0.1478 | 0.1471 |
| WRC099 | Bradi | 444 | 11 | 14 | 17 | 48 | 0.2903 | 0.1478 | 0.1471 |
| WRC100 | Bradi | 444 | 11 | 14 | 17 | 48 | 0.2903 | 0.1478 | 0.1471 |
