# Supplementary material for: Natural Variation of the RICE FLOWERING LOCUS T 1 Contributes to Flowering Time Divergence in Rice
Source: PubMed Central journal article supplement (PMC3788028; doi:10.1371/journal.pone.0075959), 2013-10-01
Supplement: pone.0075959.s016.pdf [file pone.0075959.s016.pdf]

**Table S5: Tajima's Relative Rate Test for *Hd3a* and *RFT1* with *SbHd3a* (*Shorgum bicolor*) DNA sequences**

| Accession | Outgroup | Identical sites | Unique sites | Unique Sites |             |          | $\chi^2$ | dN/dS       |             |
|-----------|----------|-----------------|--------------|--------------|-------------|----------|----------|-------------|-------------|
|           |          |                 |              | <i>Hd3a</i>  | <i>RFT1</i> | Outgroup |          | <i>Hd3a</i> | <i>RFT1</i> |
| 101508    | Sb       | 437             | 11           | 26           | 17          | 43       | 1.8837   | 0.1484      | 0.1973      |
| 105908    | Sb       | 437             | 10           | 22           | 14          | 51       | 1.7778   | 0.1570      | 0.1927      |
| A001      | Sb       | 440             | 10           | 19           | 13          | 52       | 1.1250   | 0.1497      | 0.1927      |
| A002      | Sb       | 438             | 10           | 23           | 15          | 48       | 1.6842   | 0.1376      | 0.1985      |
| A006      | Sb       | 440             | 10           | 19           | 13          | 52       | 1.1250   | 0.1497      | 0.1927      |
| A008      | Sb       | 440             | 10           | 19           | 13          | 52       | 1.1250   | 0.1497      | 0.1926      |
| A011      | Sb       | 440             | 10           | 19           | 13          | 52       | 1.1250   | 0.1497      | 0.1927      |
| A014      | Sb       | 441             | 10           | 19           | 12          | 52       | 1.5806   | 0.1497      | 0.1850      |
| A015      | Sb       | 440             | 10           | 19           | 13          | 52       | 1.1250   | 0.1497      | 0.1927      |
| A016      | Sb       | 440             | 10           | 19           | 13          | 52       | 1.1250   | 0.1497      | 0.1927      |
| A018      | Sb       | 438             | 10           | 23           | 15          | 48       | 1.6842   | 0.1376      | 0.1985      |
| A019      | Sb       | 438             | 10           | 23           | 15          | 48       | 1.6842   | 0.1376      | 0.1985      |
| A020      | Sb       | 440             | 10           | 19           | 13          | 52       | 1.1250   | 0.1497      | 0.1926      |
| A021      | Sb       | 440             | 10           | 19           | 13          | 52       | 1.1250   | 0.1497      | 0.1927      |
| A022      | Sb       | 440             | 10           | 19           | 13          | 52       | 1.1250   | 0.1497      | 0.1927      |
| A024      | Sb       | 440             | 10           | 19           | 13          | 52       | 1.1250   | 0.1497      | 0.1927      |
| A025      | Sb       | 437             | 10           | 23           | 16          | 48       | 1.2564   | 0.1376      | 0.2065      |
| A027      | Sb       | 437             | 10           | 23           | 16          | 48       | 1.2564   | 0.1376      | 0.2065      |
| A028      | Sb       | 441             | 9            | 18           | 13          | 53       | 0.8065   | 0.1412      | 0.1927      |
| A030      | Sb       | 441             | 9            | 18           | 13          | 53       | 0.8065   | 0.1412      | 0.1927      |
| A032      | Sb       | 440             | 10           | 19           | 13          | 52       | 1.1250   | 0.1497      | 0.1926      |
| A035      | Sb       | 440             | 10           | 19           | 13          | 52       | 1.1250   | 0.1497      | 0.1927      |
| A036      | Sb       | 440             | 10           | 19           | 13          | 52       | 1.1250   | 0.1497      | 0.1927      |
| A037      | Sb       | 440             | 10           | 19           | 13          | 52       | 1.1250   | 0.1497      | 0.1927      |
| A039      | Sb       | 440             | 10           | 19           | 13          | 52       | 1.1250   | 0.1497      | 0.1926      |
| A040      | Sb       | 441             | 10           | 19           | 12          | 52       | 1.5806   | 0.1497      | 0.1850      |
| A041      | Sb       | 437             | 10           | 24           | 15          | 48       | 2.0769   | 0.1437      | 0.1985      |
| A045      | Sb       | 438             | 10           | 23           | 15          | 48       | 1.6842   | 0.1376      | 0.1985      |
| A047      | Sb       | 437             | 10           | 23           | 16          | 48       | 1.2564   | 0.1376      | 0.2065      |
| A048      | Sb       | 440             | 10           | 19           | 13          | 52       | 1.1250   | 0.1497      | 0.1927      |
| A049      | Sb       | 440             | 10           | 19           | 13          | 52       | 1.1250   | 0.1497      | 0.1927      |
| A050      | Sb       | 438             | 10           | 23           | 15          | 48       | 1.6842   | 0.1376      | 0.1985      |
| A053      | Sb       | 438             | 10           | 23           | 15          | 48       | 1.6842   | 0.1376      | 0.1985      |
| A054      | Sb       | 441             | 10           | 19           | 12          | 52       | 1.5806   | 0.1497      | 0.1850      |
| A055      | Sb       | 437             | 10           | 23           | 16          | 48       | 1.2564   | 0.1376      | 0.2065      |
| A056      | Sb       | 440             | 10           | 19           | 13          | 52       | 1.1250   | 0.1497      | 0.1927      |
| A059      | Sb       | 440             | 10           | 19           | 13          | 52       | 1.1250   | 0.1497      | 0.1927      |
| A063      | Sb       | 441             | 9            | 18           | 13          | 53       | 0.8065   | 0.1412      | 0.1926      |
| A064      | Sb       | 440             | 10           | 19           | 13          | 52       | 1.1250   | 0.1497      | 0.1927      |
| A074      | Sb       | 438             | 10           | 23           | 15          | 48       | 1.6842   | 0.1376      | 0.1985      |
| A082      | Sb       | 440             | 10           | 19           | 13          | 52       | 1.1250   | 0.1497      | 0.1926      |
| A086      | Sb       | 437             | 11           | 26           | 17          | 43       | 1.8837   | 0.1484      | 0.1973      |
| A087      | Sb       | 437             | 11           | 26           | 17          | 43       | 1.8837   | 0.1484      | 0.1973      |
| A091      | Sb       | 442             | 10           | 17           | 13          | 52       | 0.5333   | 0.1473      | 0.1927      |
| A092      | Sb       | 437             | 10           | 22           | 14          | 51       | 1.7778   | 0.1568      | 0.1927      |
| A096      | Sb       | 439             | 10           | 21           | 13          | 51       | 1.8824   | 0.1612      | 0.1850      |
| A100      | Sb       | 436             | 11           | 25           | 17          | 45       | 1.5238   | 0.1548      | 0.1985      |
| A103      | Sb       | 438             | 10           | 22           | 13          | 51       | 2.3143   | 0.1674      | 0.1850      |
| A107      | Sb       | 437             | 11           | 26           | 17          | 43       | 1.8837   | 0.1484      | 0.1973      |
| A112      | Sb       | 441             | 10           | 18           | 13          | 52       | 0.8065   | 0.1537      | 0.1926      |
| A114      | Sb       | 437             | 12           | 23           | 15          | 47       | 1.6842   | 0.1459      | 0.1985      |
| AS017     | Sb       | 440             | 10           | 19           | 13          | 52       | 1.1250   | 0.1497      | 0.1926      |
| AS062     | Sb       | 440             | 10           | 19           | 13          | 52       | 1.1250   | 0.1497      | 0.1926      |
| AS083     | Sb       | 439             | 10           | 21           | 13          | 51       | 1.8824   | 0.1506      | 0.1724      |
| AS084     | Sb       | 437             | 9            | 22           | 13          | 53       | 2.3143   | 0.1631      | 0.1957      |
| AS088     | Sb       | 435             | 11           | 26           | 16          | 46       | 2.3810   | 0.1568      | 0.1985      |
| AS089     | Sb       | 441             | 10           | 18           | 13          | 52       | 0.8065   | 0.1537      | 0.1926      |
| AS092     | Sb       | 436             | 10           | 24           | 13          | 51       | 3.2703   | 0.1589      | 0.1850      |

|                |    |     |    |    |    |    |        |        |        |
|----------------|----|-----|----|----|----|----|--------|--------|--------|
| JRC012         | Sb | 438 | 10 | 23 | 15 | 48 | 1.6842 | 0.1376 | 0.1985 |
| JRC021         | Sb | 440 | 10 | 19 | 13 | 52 | 1.1250 | 0.1497 | 0.1927 |
| JRC022         | Sb | 438 | 10 | 23 | 15 | 48 | 1.6842 | 0.1376 | 0.1985 |
| JRC027         | Sb | 438 | 10 | 23 | 15 | 48 | 1.6842 | 0.1376 | 0.1985 |
| JRC033         | Sb | 437 | 10 | 24 | 15 | 48 | 2.0769 | 0.1341 | 0.1985 |
| JRC034         | Sb | 438 | 10 | 23 | 15 | 48 | 1.6842 | 0.1376 | 0.1985 |
| JRC042         | Sb | 440 | 10 | 19 | 13 | 52 | 1.1250 | 0.1497 | 0.1927 |
| JRC047         | Sb | 438 | 10 | 23 | 15 | 48 | 1.6842 | 0.1376 | 0.1985 |
| NonaBokra      | Sb | 440 | 10 | 19 | 13 | 52 | 1.1250 | 0.1497 | 0.1927 |
| O_brachyantha  | Sb | 439 | 8  | 25 | 18 | 44 | 1.1395 | 0.1775 | 0.2370 |
| O_longistamina | Sb | 438 | 11 | 27 | 15 | 43 | 3.4286 | 0.1538 | 0.1948 |
| O_meridionalis | Sb | 435 | 9  | 22 | 19 | 49 | 0.2195 | 0.1484 | 0.1833 |
| O_punctata     | Sb | 435 | 8  | 21 | 22 | 48 | 0.0233 | 0.1608 | 0.1489 |
| W0106          | Sb | 439 | 10 | 20 | 13 | 52 | 1.4848 | 0.1554 | 0.1927 |
| W0157          | Sb | 434 | 11 | 27 | 16 | 46 | 2.8140 | 0.1631 | 0.1985 |
| W1294          | Sb | 433 | 11 | 25 | 19 | 46 | 0.8182 | 0.1409 | 0.2448 |
| W1666          | Sb | 436 | 10 | 23 | 14 | 51 | 2.1892 | 0.1530 | 0.1927 |
| W1807          | Sb | 439 | 10 | 20 | 14 | 51 | 1.0588 | 0.1446 | 0.1926 |
| W1865          | Sb | 439 | 10 | 20 | 14 | 51 | 1.0588 | 0.1446 | 0.1926 |
| W1943          | Sb | 436 | 11 | 25 | 17 | 45 | 1.5238 | 0.1548 | 0.1985 |
| W1944          | Sb | 436 | 11 | 25 | 17 | 45 | 1.5238 | 0.1548 | 0.1985 |
| W2014          | Sb | 436 | 11 | 25 | 17 | 45 | 1.5238 | 0.1548 | 0.1985 |
| W2265          | Sb | 438 | 10 | 22 | 13 | 51 | 2.3143 | 0.1570 | 0.1850 |
| WRC001         | Sb | 438 | 10 | 23 | 15 | 48 | 1.6842 | 0.1376 | 0.1985 |
| WRC002         | Sb | 441 | 10 | 19 | 12 | 52 | 1.5806 | 0.1497 | 0.1850 |
| WRC003         | Sb | 441 | 9  | 18 | 13 | 53 | 0.8065 | 0.1412 | 0.1927 |
| WRC004         | Sb | 440 | 10 | 19 | 13 | 52 | 1.1250 | 0.1497 | 0.1926 |
| WRC005         | Sb | 441 | 10 | 19 | 12 | 52 | 1.5806 | 0.1497 | 0.1850 |
| WRC006         | Sb | 441 | 10 | 19 | 12 | 52 | 1.5806 | 0.1497 | 0.1850 |
| WRC007         | Sb | 440 | 10 | 19 | 13 | 52 | 1.1250 | 0.1497 | 0.1927 |
| WRC009         | Sb | 438 | 10 | 23 | 16 | 47 | 1.2564 | 0.1362 | 0.1985 |
| WRC010         | Sb | 438 | 10 | 23 | 15 | 48 | 1.6842 | 0.1376 | 0.1985 |
| WRC011         | Sb | 441 | 10 | 19 | 12 | 52 | 1.5806 | 0.1497 | 0.1850 |
| WRC013         | Sb | 440 | 10 | 19 | 13 | 52 | 1.1250 | 0.1497 | 0.1927 |
| WRC014         | Sb | 438 | 10 | 23 | 15 | 48 | 1.6842 | 0.1376 | 0.1985 |
| WRC015         | Sb | 441 | 10 | 19 | 12 | 52 | 1.5806 | 0.1497 | 0.1850 |
| WRC016         | Sb | 440 | 10 | 19 | 13 | 52 | 1.1250 | 0.1497 | 0.1927 |
| WRC017         | Sb | 440 | 10 | 19 | 13 | 52 | 1.1250 | 0.1497 | 0.1927 |
| WRC019         | Sb | 441 | 10 | 19 | 12 | 52 | 1.5806 | 0.1497 | 0.1850 |
| WRC020         | Sb | 440 | 10 | 19 | 13 | 52 | 1.1250 | 0.1497 | 0.1927 |
| WRC021         | Sb | 437 | 10 | 24 | 15 | 48 | 2.0769 | 0.1341 | 0.1985 |
| WRC022         | Sb | 438 | 10 | 23 | 15 | 48 | 1.6842 | 0.1376 | 0.1985 |
| WRC023         | Sb | 438 | 10 | 23 | 15 | 48 | 1.6842 | 0.1376 | 0.1985 |
| WRC024         | Sb | 438 | 10 | 23 | 15 | 48 | 1.6842 | 0.1376 | 0.1985 |
| WRC025         | Sb | 441 | 10 | 19 | 12 | 52 | 1.5806 | 0.1497 | 0.1850 |
| WRC026         | Sb | 441 | 10 | 19 | 12 | 52 | 1.5806 | 0.1497 | 0.1850 |
| WRC027         | Sb | 440 | 10 | 19 | 13 | 52 | 1.1250 | 0.1497 | 0.1926 |
| WRC028         | Sb | 440 | 10 | 19 | 13 | 52 | 1.1250 | 0.1497 | 0.1926 |
| WRC029         | Sb | 441 | 10 | 19 | 12 | 52 | 1.5806 | 0.1497 | 0.1850 |
| WRC030         | Sb | 440 | 10 | 19 | 13 | 52 | 1.1250 | 0.1497 | 0.1926 |
| WRC031         | Sb | 441 | 10 | 19 | 12 | 52 | 1.5806 | 0.1497 | 0.1850 |
| WRC033         | Sb | 441 | 10 | 19 | 12 | 52 | 1.5806 | 0.1497 | 0.1850 |
| WRC034         | Sb | 441 | 10 | 19 | 12 | 52 | 1.5806 | 0.1497 | 0.1850 |
| WRC035         | Sb | 441 | 10 | 19 | 12 | 52 | 1.5806 | 0.1497 | 0.1850 |
| WRC036         | Sb | 440 | 10 | 19 | 13 | 52 | 1.1250 | 0.1497 | 0.1926 |
| WRC037         | Sb | 441 | 10 | 19 | 12 | 52 | 1.5806 | 0.1497 | 0.1850 |
| WRC038         | Sb | 441 | 10 | 19 | 12 | 52 | 1.5806 | 0.1497 | 0.1850 |
| WRC039         | Sb | 440 | 10 | 19 | 13 | 52 | 1.1250 | 0.1497 | 0.1926 |
| WRC040         | Sb | 440 | 10 | 19 | 13 | 52 | 1.1250 | 0.1497 | 0.1926 |
| WRC042         | Sb | 438 | 10 | 23 | 15 | 48 | 1.6842 | 0.1376 | 0.1985 |
| WRC043         | Sb | 438 | 10 | 23 | 15 | 48 | 1.6842 | 0.1376 | 0.1985 |

|        |    |     |    |    |    |    |        |        |        |
|--------|----|-----|----|----|----|----|--------|--------|--------|
| WRC044 | Sb | 438 | 10 | 23 | 15 | 48 | 1.6842 | 0.1376 | 0.1985 |
| WRC046 | Sb | 437 | 10 | 23 | 16 | 48 | 1.2564 | 0.1376 | 0.2065 |
| WRC047 | Sb | 438 | 10 | 23 | 15 | 48 | 1.6842 | 0.1376 | 0.1985 |
| WRC048 | Sb | 437 | 10 | 23 | 16 | 48 | 1.2564 | 0.1376 | 0.2065 |
| WRC049 | Sb | 438 | 10 | 22 | 15 | 49 | 1.3243 | 0.1376 | 0.2065 |
| WRC050 | Sb | 441 | 10 | 19 | 12 | 52 | 1.5806 | 0.1497 | 0.1850 |
| WRC051 | Sb | 438 | 10 | 23 | 15 | 48 | 1.6842 | 0.1376 | 0.1985 |
| WRC053 | Sb | 437 | 10 | 24 | 15 | 48 | 2.0769 | 0.1437 | 0.1985 |
| WRC055 | Sb | 437 | 10 | 24 | 15 | 48 | 2.0769 | 0.1437 | 0.1985 |
| WRC057 | Sb | 437 | 10 | 24 | 15 | 48 | 2.0769 | 0.1341 | 0.1985 |
| WRC058 | Sb | 441 | 9  | 18 | 13 | 53 | 0.8065 | 0.1412 | 0.1927 |
| WRC059 | Sb | 440 | 10 | 19 | 13 | 52 | 1.1250 | 0.1497 | 0.1927 |
| WRC060 | Sb | 440 | 10 | 19 | 13 | 52 | 1.1250 | 0.1497 | 0.1927 |
| WRC061 | Sb | 441 | 10 | 19 | 12 | 52 | 1.5806 | 0.1497 | 0.1850 |
| WRC062 | Sb | 440 | 10 | 19 | 13 | 52 | 1.1250 | 0.1497 | 0.1927 |
| WRC064 | Sb | 440 | 9  | 19 | 13 | 53 | 1.1250 | 0.1376 | 0.1927 |
| WRC065 | Sb | 440 | 10 | 19 | 13 | 52 | 1.1250 | 0.1497 | 0.1927 |
| WRC066 | Sb | 441 | 10 | 19 | 12 | 52 | 1.5806 | 0.1497 | 0.1850 |
| WRC067 | Sb | 438 | 10 | 23 | 15 | 48 | 1.6842 | 0.1376 | 0.1985 |
| WRC068 | Sb | 438 | 10 | 23 | 15 | 48 | 1.6842 | 0.1376 | 0.1985 |
| WRC096 | Sb | 440 | 10 | 19 | 13 | 52 | 1.1250 | 0.1497 | 0.1927 |
| WRC097 | Sb | 437 | 10 | 23 | 16 | 48 | 1.2564 | 0.1376 | 0.2065 |
| WRC098 | Sb | 440 | 10 | 19 | 13 | 52 | 1.1250 | 0.1497 | 0.1927 |
| WRC099 | Sb | 440 | 10 | 19 | 13 | 52 | 1.1250 | 0.1497 | 0.1927 |
| WRC100 | Sb | 440 | 10 | 19 | 13 | 52 | 1.1250 | 0.1497 | 0.1927 |

---
