# Supplementary material for: Natural Variation of the RICE FLOWERING LOCUS T 1 Contributes to Flowering Time Divergence in Rice
Source: PubMed Central journal article supplement (PMC3788028; doi:10.1371/journal.pone.0075959), 2013-10-01
Supplement: pone.0075959.s017.pdf [file pone.0075959.s017.pdf]

**Table S6 : SNP information**

| SNP name       | Chromosome | Positions | RefBase | SNPBase | RefNumber | SNPNumber |
|----------------|------------|-----------|---------|---------|-----------|-----------|
| PeakSNP        | 6          | 2912415   | A       | G       | 531       | 419       |
| interval       | 6          | 2922659   | T       | A       | 512       | 433       |
| RFT1pro_1      | 6          | 2924005   | T       | A       | 514       | 436       |
| RFT1pro_2      | 6          | 2924583   | G       | A       | 822       | 112       |
| RFT1pro_3      | 6          | 2924782   | A       | G       | 829       | 114       |
| RFT1pro_4      | 6          | 2924932   | G       | A       | 648       | 294       |
| RFT1pro_5      | 6          | 2924990   | G       | C       | 645       | 298       |
| RFT1pro_6      | 6          | 2925031   | G       | A       | 834       | 110       |
| RFT1pro_7      | 6          | 2925070   | C       | T       | 531       | 420       |
| RFT1pro_8      | 6          | 2925147   | T       | C       | 531       | 414       |
| RFT1pro_9      | 6          | 2925171   | G       | A       | 573       | 300       |
| RFT1pro_10     | 6          | 2925202   | G       | A       | 532       | 413       |
| RFT1pro_11     | 6          | 2925233   | G       | C       | 532       | 416       |
| RFT1pro_12     | 6          | 2925353   | T       | A       | 642       | 300       |
| RFT1pro_13     | 6          | 2925508   | G       | A       | 837       | 110       |
| RFT1pro_14     | 6          | 2925518   | C       | T       | 645       | 294       |
| RFT1pro_15     | 6          | 2925543   | G       | A       | 835       | 112       |
| RFT1pro_16     | 6          | 2925695   | A       | G       | 519       | 402       |
| RFT_exon1      | 6          | 2925914   | G       | T       | 653       | 10        |
| RFT_exon1_2    | 6          | 2926161   | T       | C       | 529       | 415       |
| RFT1_V>A       | 6          | 2926172   | T       | C       | 530       | 415       |
| RFT1intron1    | 6          | 2926389   | T       | A       | 661       | 234       |
| RFT1_P>S       | 6          | 2926623   | C       | T       | 935       | 10        |
| RFT1intron3_1  | 6          | 2926689   | C       | A       | 926       | 8         |
| RFT1intron3_2  | 6          | 2927035   | A       | G       | 829       | 63        |
| RFT1intron3_3  | 6          | 2927060   | T       | C       | 366       | 16        |
| RFT1_E105K     | 6          | 2927179   | G       | A       | 695       | 169       |
| Hd3apro_1      | 6          | 2937180   | G       | C       | 369       | 15        |
| Hd3apro_2      | 6          | 2937333   | A       | G       | 511       | 425       |
| Hd3apro_3      | 6          | 2938175   | C       | A       | 927       | 14        |
| Hd3apro_4      | 6          | 2938295   | C       | T       | 834       | 114       |
| Hd3apro_5      | 6          | 2938469   | C       | T       | 508       | 436       |
| Hd3apro_6      | 6          | 2938488   | C       | A       | 636       | 305       |
| Hd3apro_7      | 6          | 2938653   | T       | C       | 622       | 237       |
| Hd3apro_8      | 6          | 2938739   | A       | G       | 511       | 434       |
| Hd3apro_9      | 6          | 2938839   | C       | A       | 532       | 411       |
| Hd3a_exon1_1   | 6          | 2939078   | C       | A       | 644       | 302       |
| Hd3a_exon1_2   | 6          | 2939131   | A       | T       | 509       | 436       |
| Hd3a_intron1_1 | 6          | 2939396   | G       | T       | 833       | 115       |
| Hd3a_intron1_2 | 6          | 2939505   | T       | G       | 527       | 422       |
| Hd3a_intron3_1 | 6          | 2940098   | A       | T       | 511       | 422       |
| Hd3a_intron3_2 | 6          | 2940201   | T       | C       | 507       | 440       |
| Hd3a_intron3_3 | 6          | 2940270   | T       | C       | 833       | 114       |
| Hd3a_intron3_4 | 6          | 2940347   | T       | G       | 834       | 114       |
| Hd3a_intron3_5 | 6          | 2940864   | C       | A       | 640       | 288       |
| Hd3a_intron3_6 | 6          | 2941053   | C       | T       | 508       | 441       |
| Hd3a_P179N     | 6          | 2941150   | A       | C       | 147       | 70        |
| Hd3a_3UTR      | 6          | 2941433   | A       | T       | 511       | 424       |

\*RefBase: reference genome base (IRGSP Build 4.0)
