# Supplementary material for: Natural Variation of the RICE FLOWERING LOCUS T 1 Contributes to Flowering Time Divergence in Rice
Source: PubMed Central journal article supplement (PMC3788028; doi:10.1371/journal.pone.0075959), 2013-10-01
Supplement: pone.0075959.s018.pdf [file pone.0075959.s018.pdf]

**Table S7****Primer sequences for genotyping**

| Name    | Forward               | Reverse                  | Note / SNP (Kos/Non)                           |
|---------|-----------------------|--------------------------|------------------------------------------------|
| InDel-1 | GTGTTGCAGCTTGAGGATGA  | TGTATTGGCCGTAATCGTGA     | Electrophoresis                                |
| InDel-2 | TACTGCAGCTGCTGATTGCT  | GCGGGATACCATGGTCTAAA     | Electrophoresis                                |
| SNP-1   | AACTCCGGACAACACTTGG   | CAAGCAATCCAAGCAACTGA     | TAAAATCATTAGTCCCTTAAC<br>TAAAATCATTGTCCCTTAAC  |
| InDel-3 | CTCTTGTGGTTGGCAGGAT   | GGTCTACCATCACCTGTAGG     | Electrophoresis                                |
| InDel-4 | CCTGTCAGTGTGGCTAG     | GTCAAATTAATAACCTCTAACTAA | sequencing                                     |
| InDel-5 | TTATTACCTTGGTCCTACCCC | CTAGGGGTAGACCCTCCTG      | sequencing                                     |
| CAPs-1  | ATTTGAAGGATAGGGCTGTAC | ATACAGCTAGGCAGGTCTCA     | SmaI digestion                                 |
| CAPs-2  | TACGGGCTACGGACATAACA  | CGCTCAGCAACGAGTTTC       | TaqI digestion                                 |
| SNP-3   | CAGGTCCTGGCATTCAAAAA  | AATGAAACGCCGACGATATT     | TGCATAAAAAGCGTGTGTTTA<br>TACATAAAAAGTGTGTTGTTA |
| SNP-2   | CTCGTCCACACGTACAGGAA  | AGGTGACCTTGAGGTTGGTG     | TTGCTCCCTGCAACTTGCTGC<br>TTGCTCCCTGAAACTTGCTGC |
| CAPs-3  | TCA GAACTTCAACACCAAGG | ACCTTAGCCTTGCTCAGCTA     | HaeIII digestion                               |

**Primer sequences for *RFT1* and *Hd3a* sequencing**

| Name          | Forward               | Reverse               |
|---------------|-----------------------|-----------------------|
| RFT1_5_3      | CCATCCCTGTCCAATAATGC  | TTTTACAAGCTTCATCTCTC  |
| RFT1_5_1      | CCACCACACCTTTCAAGACA  | ACCATGTCTCATGCAAGACC  |
| RFT1_5_2      | CTGGGCACATCATAGTAAGG  | AGGTTAGTGATCCGGACGAA  |
| RFT1_exon1    | TGGCTAGCTTAACCTTCCTG  | GTCTACCATCACCTGTAGGT  |
| RFT1_exon2    | TATCTTGGATGCAGAGACCC  | ATGGGGTAGGACCCAAGGTAA |
| RFT1_intron_1 | TCAATTTTCGATGTAACAGCA | TTATCTACGTTATTCACCAT  |
| RFT1_exon4    | CGGAGGGAGTATCTATTTTG  | CACACTTAAGAGCCTGCATG  |
| Hd3a_5_4      | CACAGCTAGAGATGGTATCG  | ATGAAATCATAATTAAGG    |
| Hd3a_5_3      | CTTAAATTTTGGATGTGTGT  | CCGCAACTTATCAACCCGTA  |
| Hd3a_5_1      | CGGAAATGGTATAAAACGGG  | TCTGCATCGTCTTCCTGTAC  |
| Hd3a_5_2      | GCTCGATCATATCCCATCTC  | TAGGTGACCTTGAGGTTGGT  |
| Hd3a_exon1    | CAGCTGCAGCTAGTAAGCAA  | TCTGCACCAACTACGACACA  |
| Hd3a_exon2    | TGTGTCGTAGTTGGTGCAGA  | CCCCAAACAATAGTATGGA   |
| Hd3a_exon4    | AGCTGTTGCACATGCTCATG  | CTGAACCTGCAATGTATAGC  |

**Primer sequences for *RFT1(E105K)* construction**

| Name         |                                    |
|--------------|------------------------------------|
| RFT1-XhoI-F  | CTCGAGCCTGTCACTGTTTGGCTAG          |
| RFT1-E105K-R | CACCTTTTGCCCAAATGTTGCTCCAGTG       |
| RFT1-E105K-F | TTGGGCAAAAGGTGATGTGCTACGAGAG       |
| RFT1-NotI-R  | CGCGGCCGCCTCGAGCCAGGGGTAGACCCTCCTG |
